# Supplementary material for: Confinement effect on hydrolysis in small lipid vesicles
Source: Royal Society of Chemistry journal article supplement (doi:10.1039/d2sc05747f), 2023-01-01
Supplement: d2sc05747f1.pdf [file d2sc05747f1.pdf]

# The effect on hydrolysis of confinement in small lipid vesicles

Ben Woods, Katherine Thompson, Nicolas Szita, Shu Chen, Lilia Milanesi, Salvador Tomas

***Supplementary information: Cryo-TEM images.*** Images S61-S66 were obtained from samples subjected to osmotic shock (Sample S6, see Supplementary Information for composition details). Images S21-S26 from samples that had not undergone osmotic shock. (Sample S2, see Supplementary information for composition details). The label D is used to highlight the presence of double lamella vesicles, The label S, single lamella. Multilamellar structures are not quantified. The double vertical line has a total width of 11 nm (i.e., that of 2 membranes plus the inter-membrane thickness  $t$  calculated) and has been placed on top of the double lamella to highlight the closeness to the expected structure. See Supplementary information for calculation details and Supplementary Figure S5 for a summary of the EM calculation results.



S61

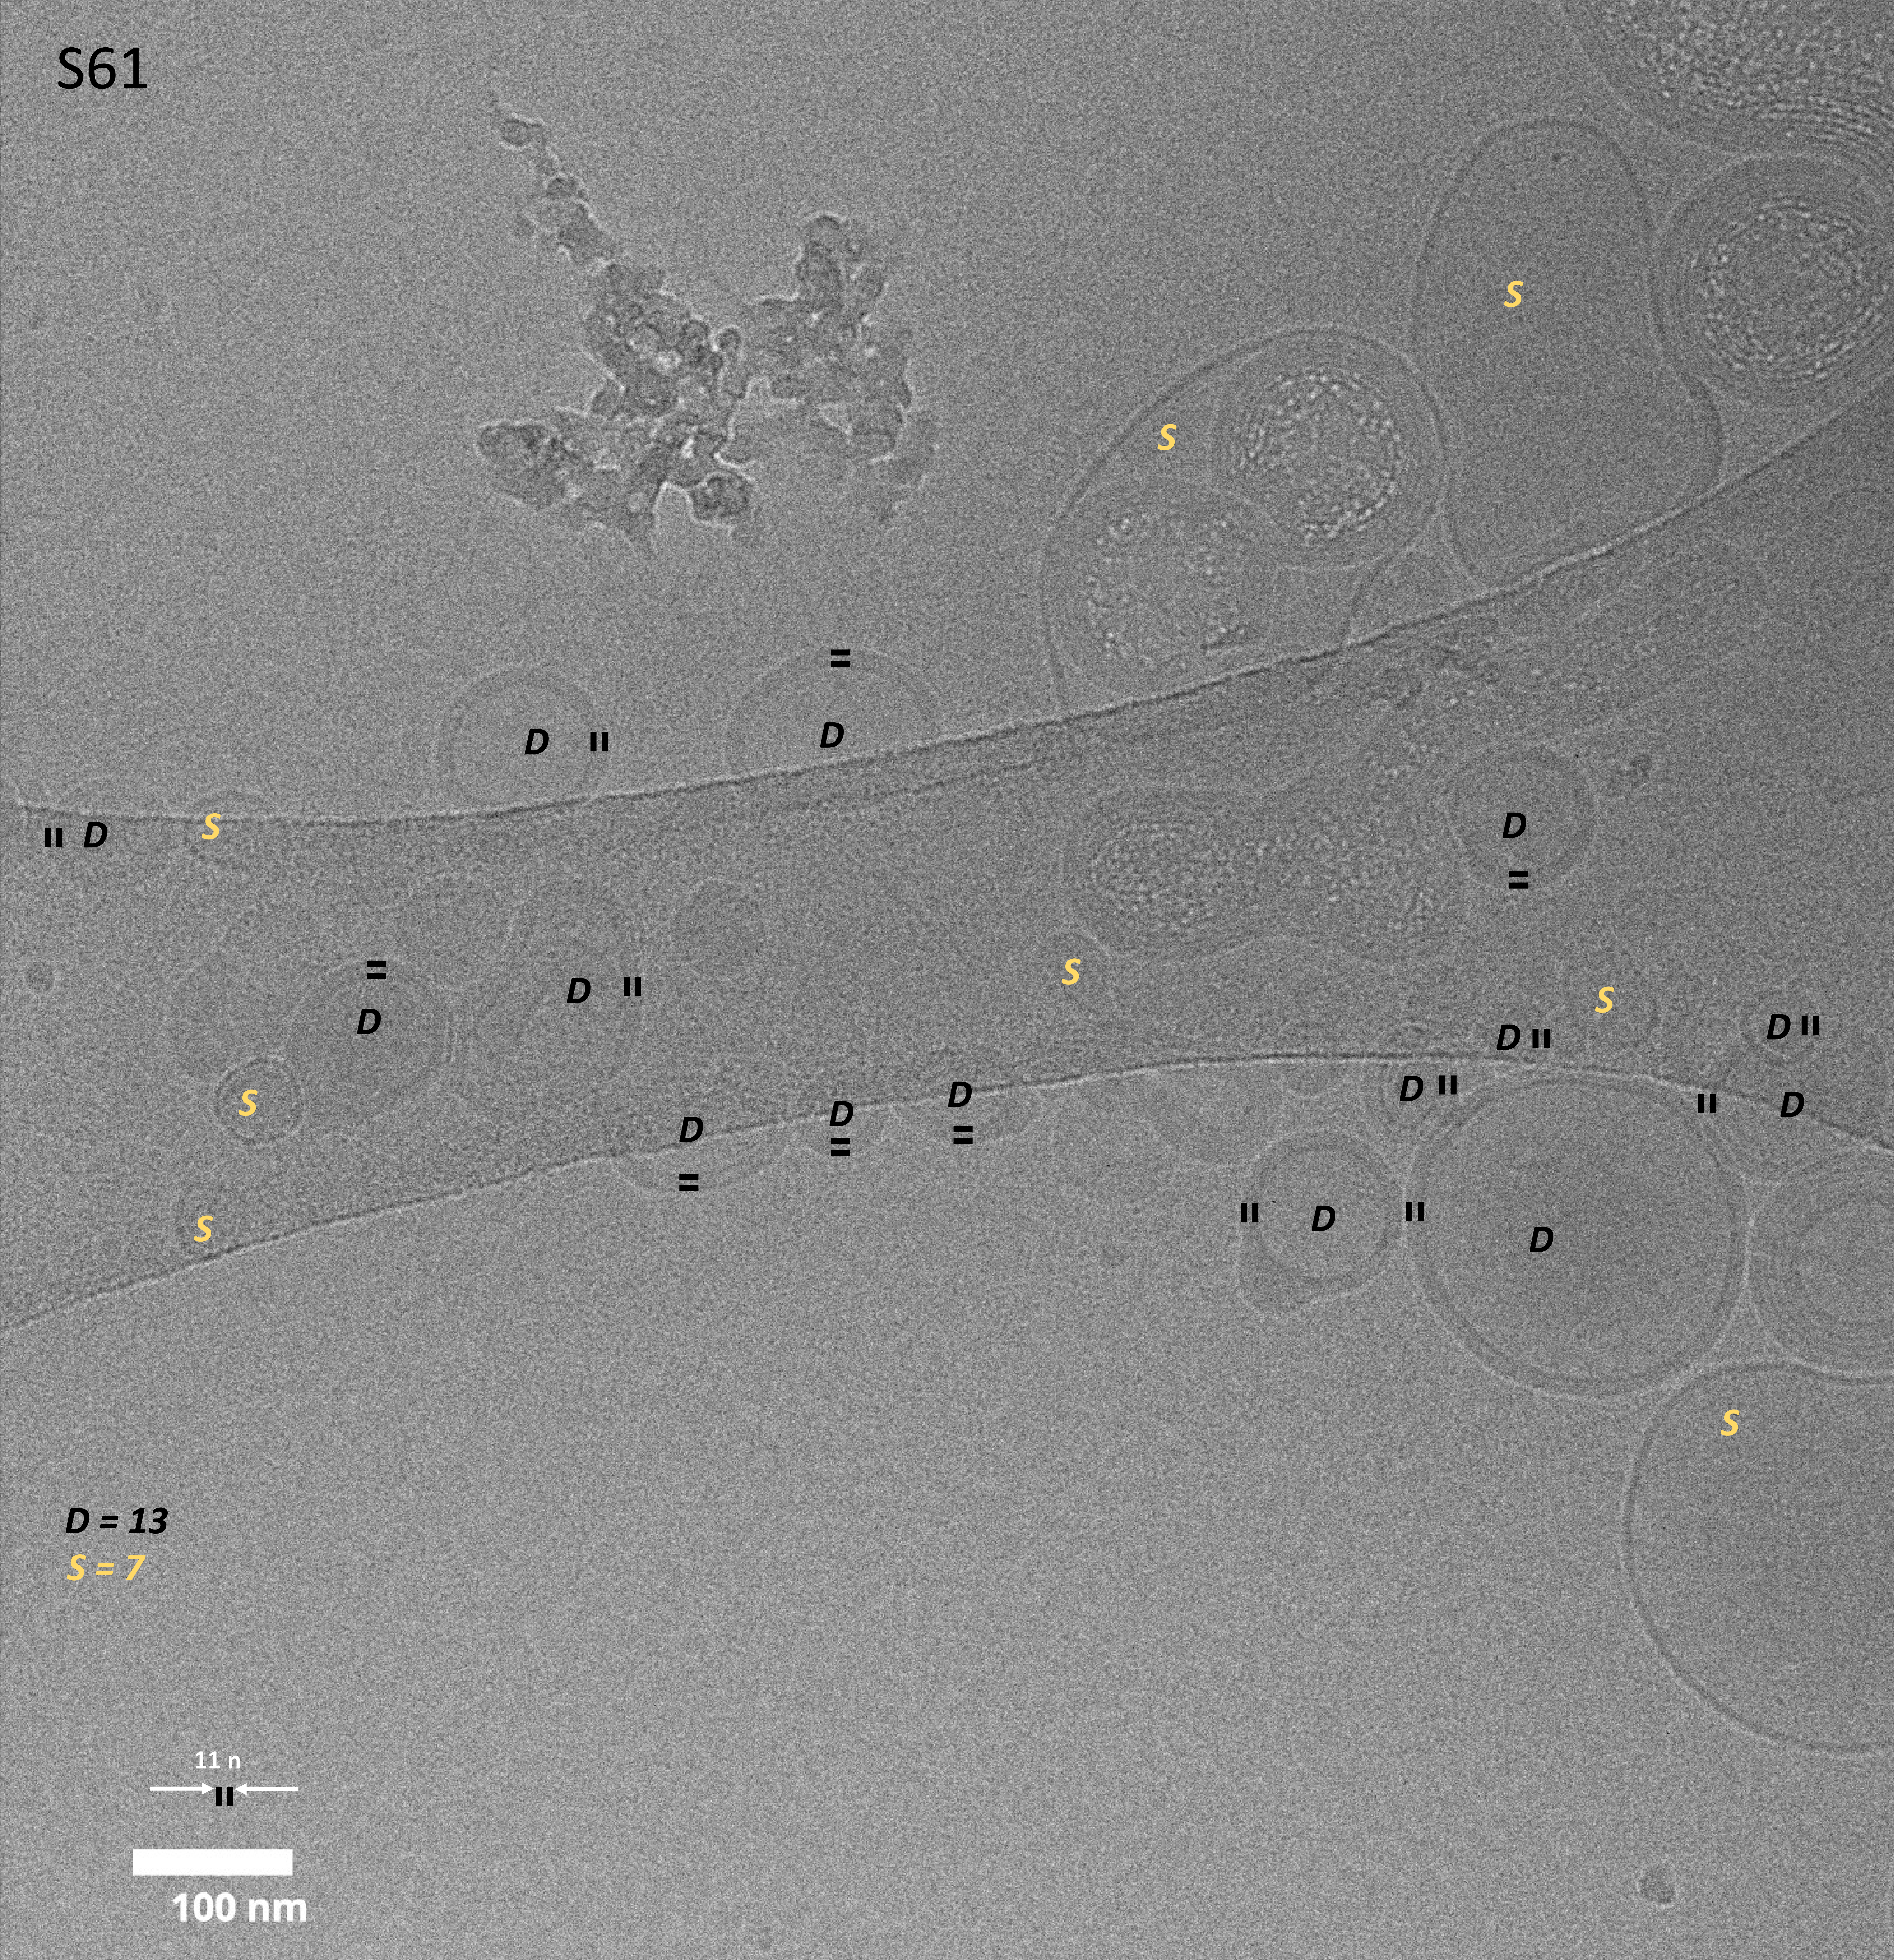

|| D

S

D ||

=

D

D

=

=

D

D ||

S

S

D ||

D ||

S

D

D

=

D

=

D ||

||

D

S

||

D

||

D

S

D = 13

S = 7

11 n

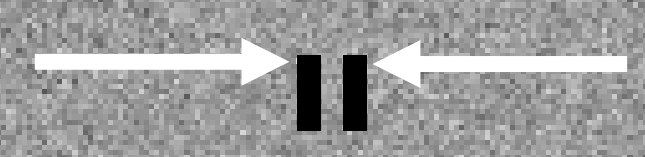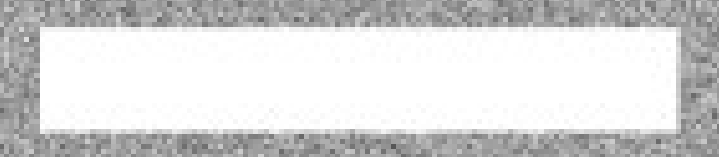

100 nm



S62

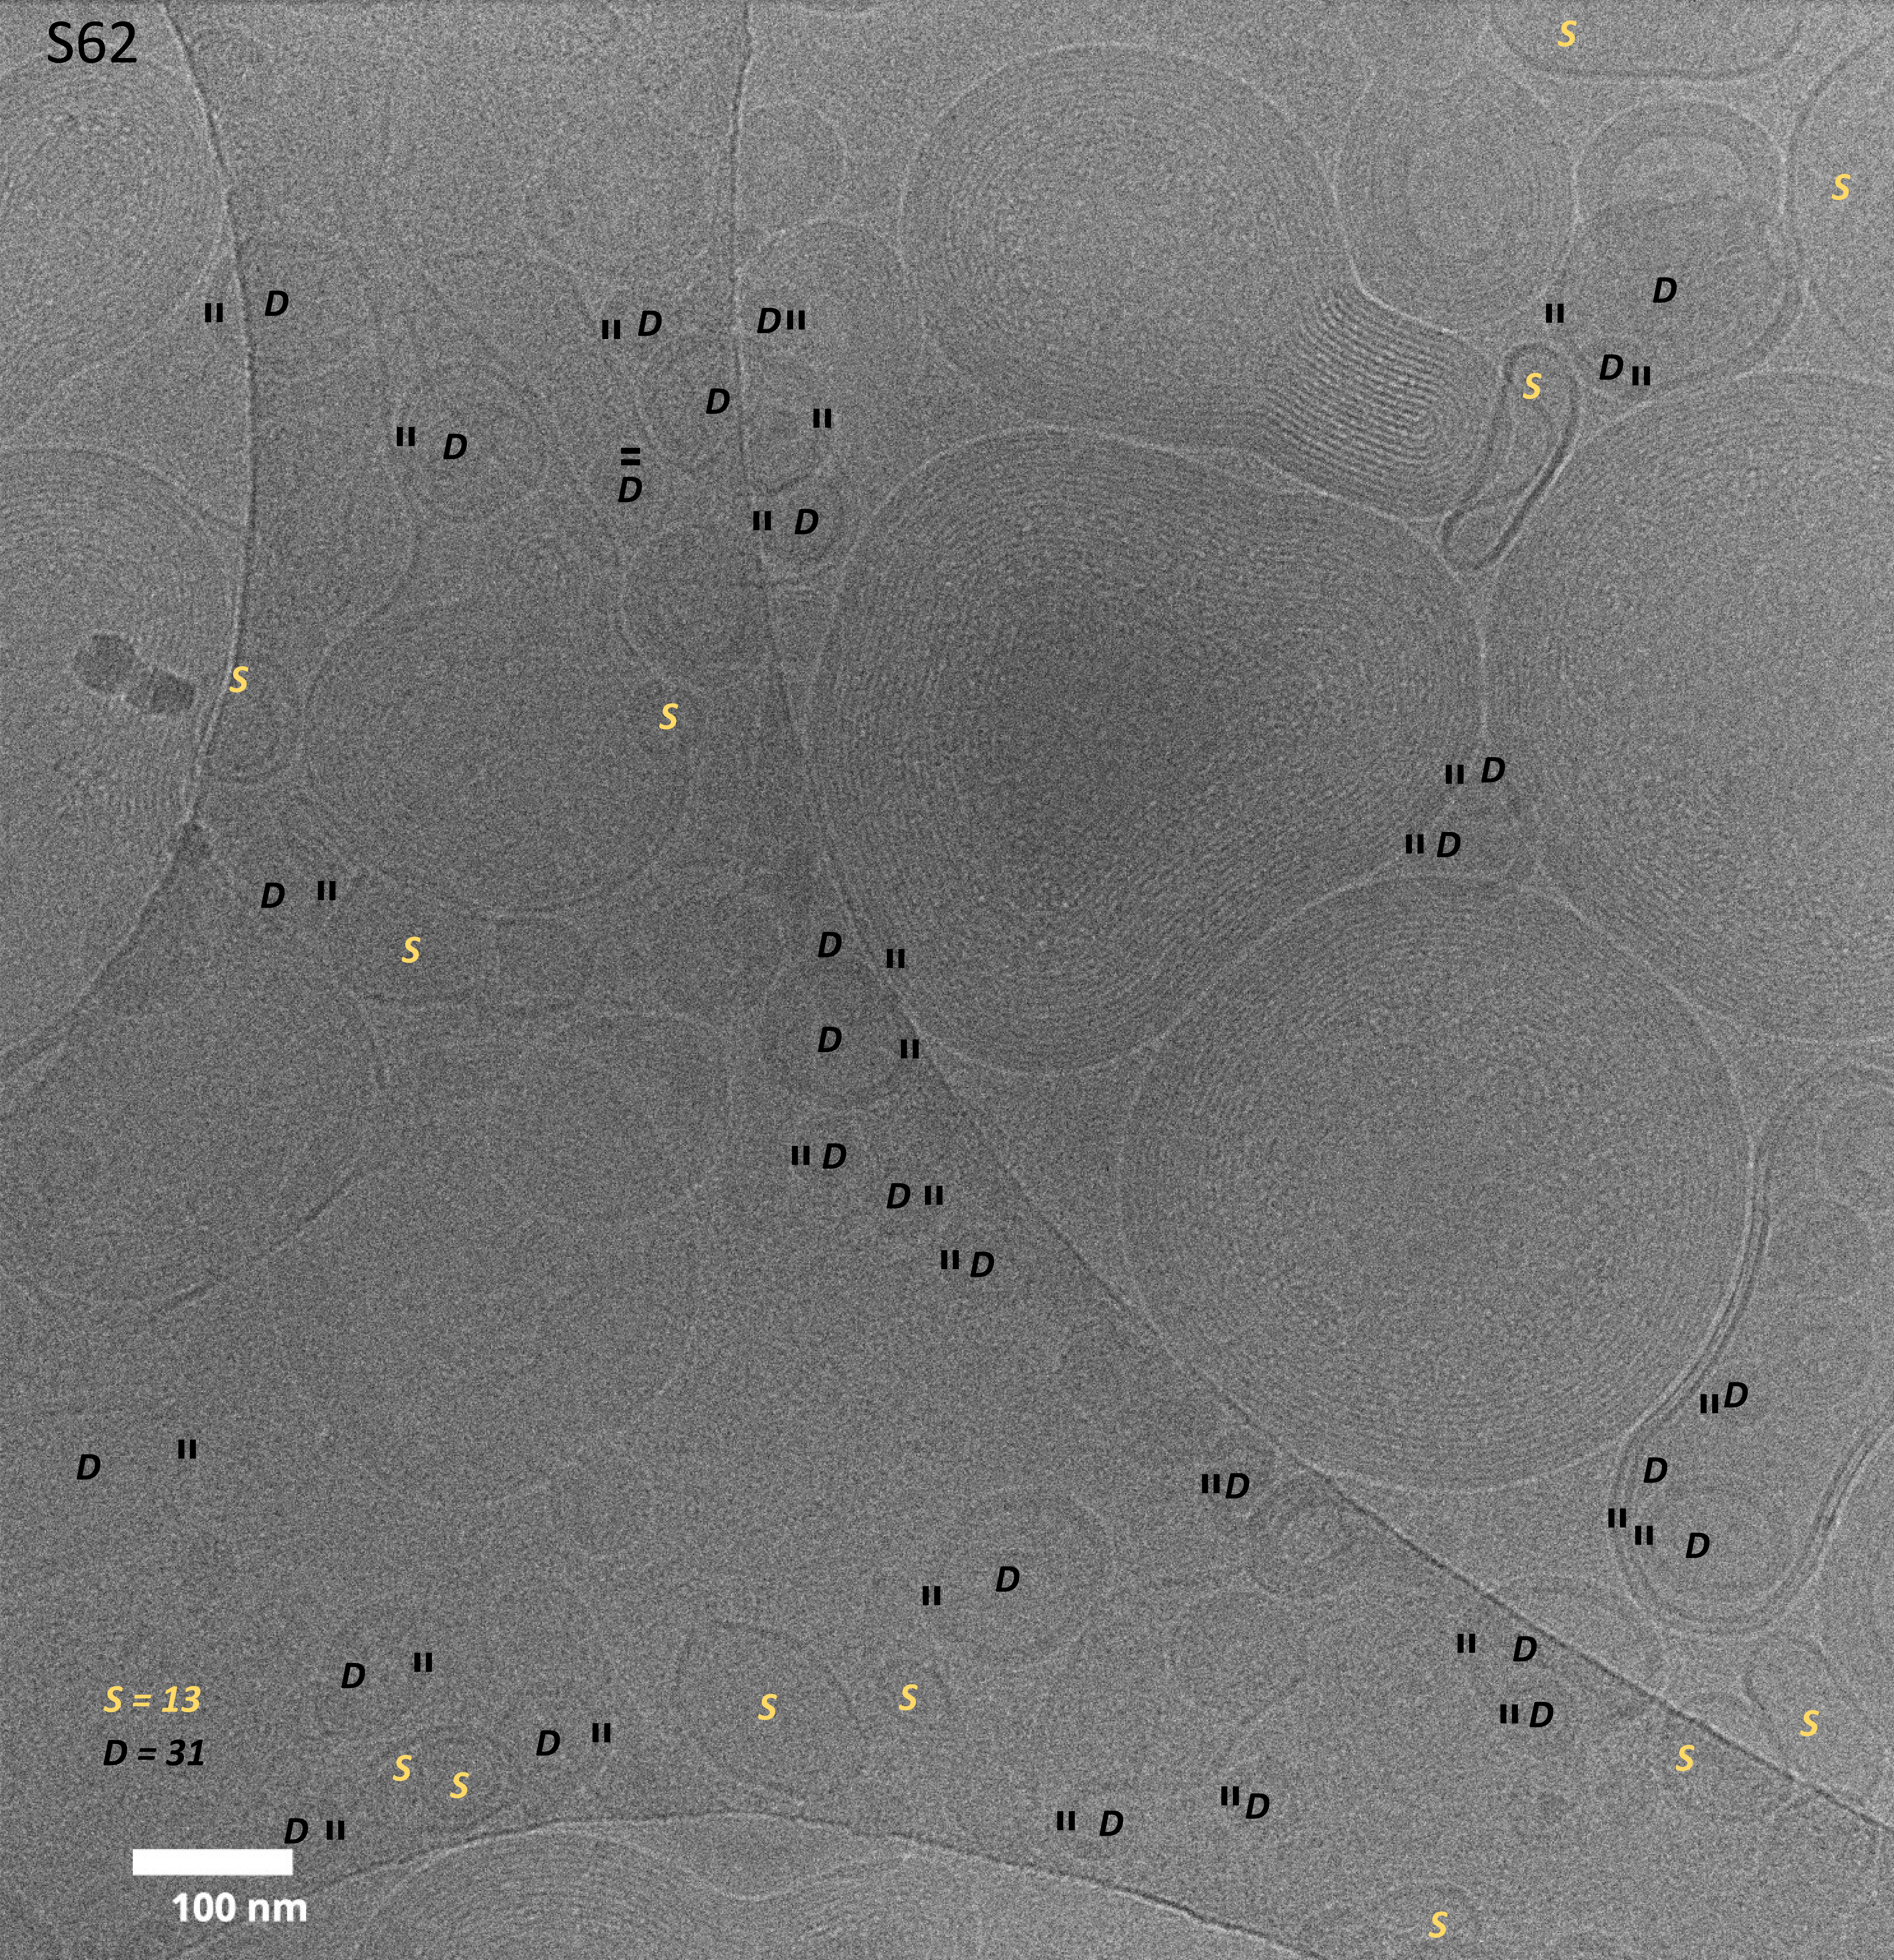

S = 13  
D = 31

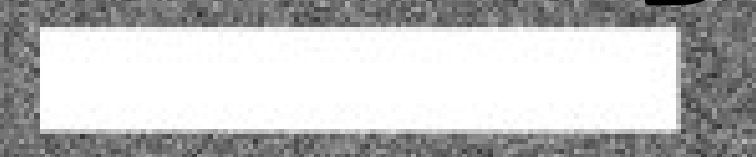

100 nm



S63

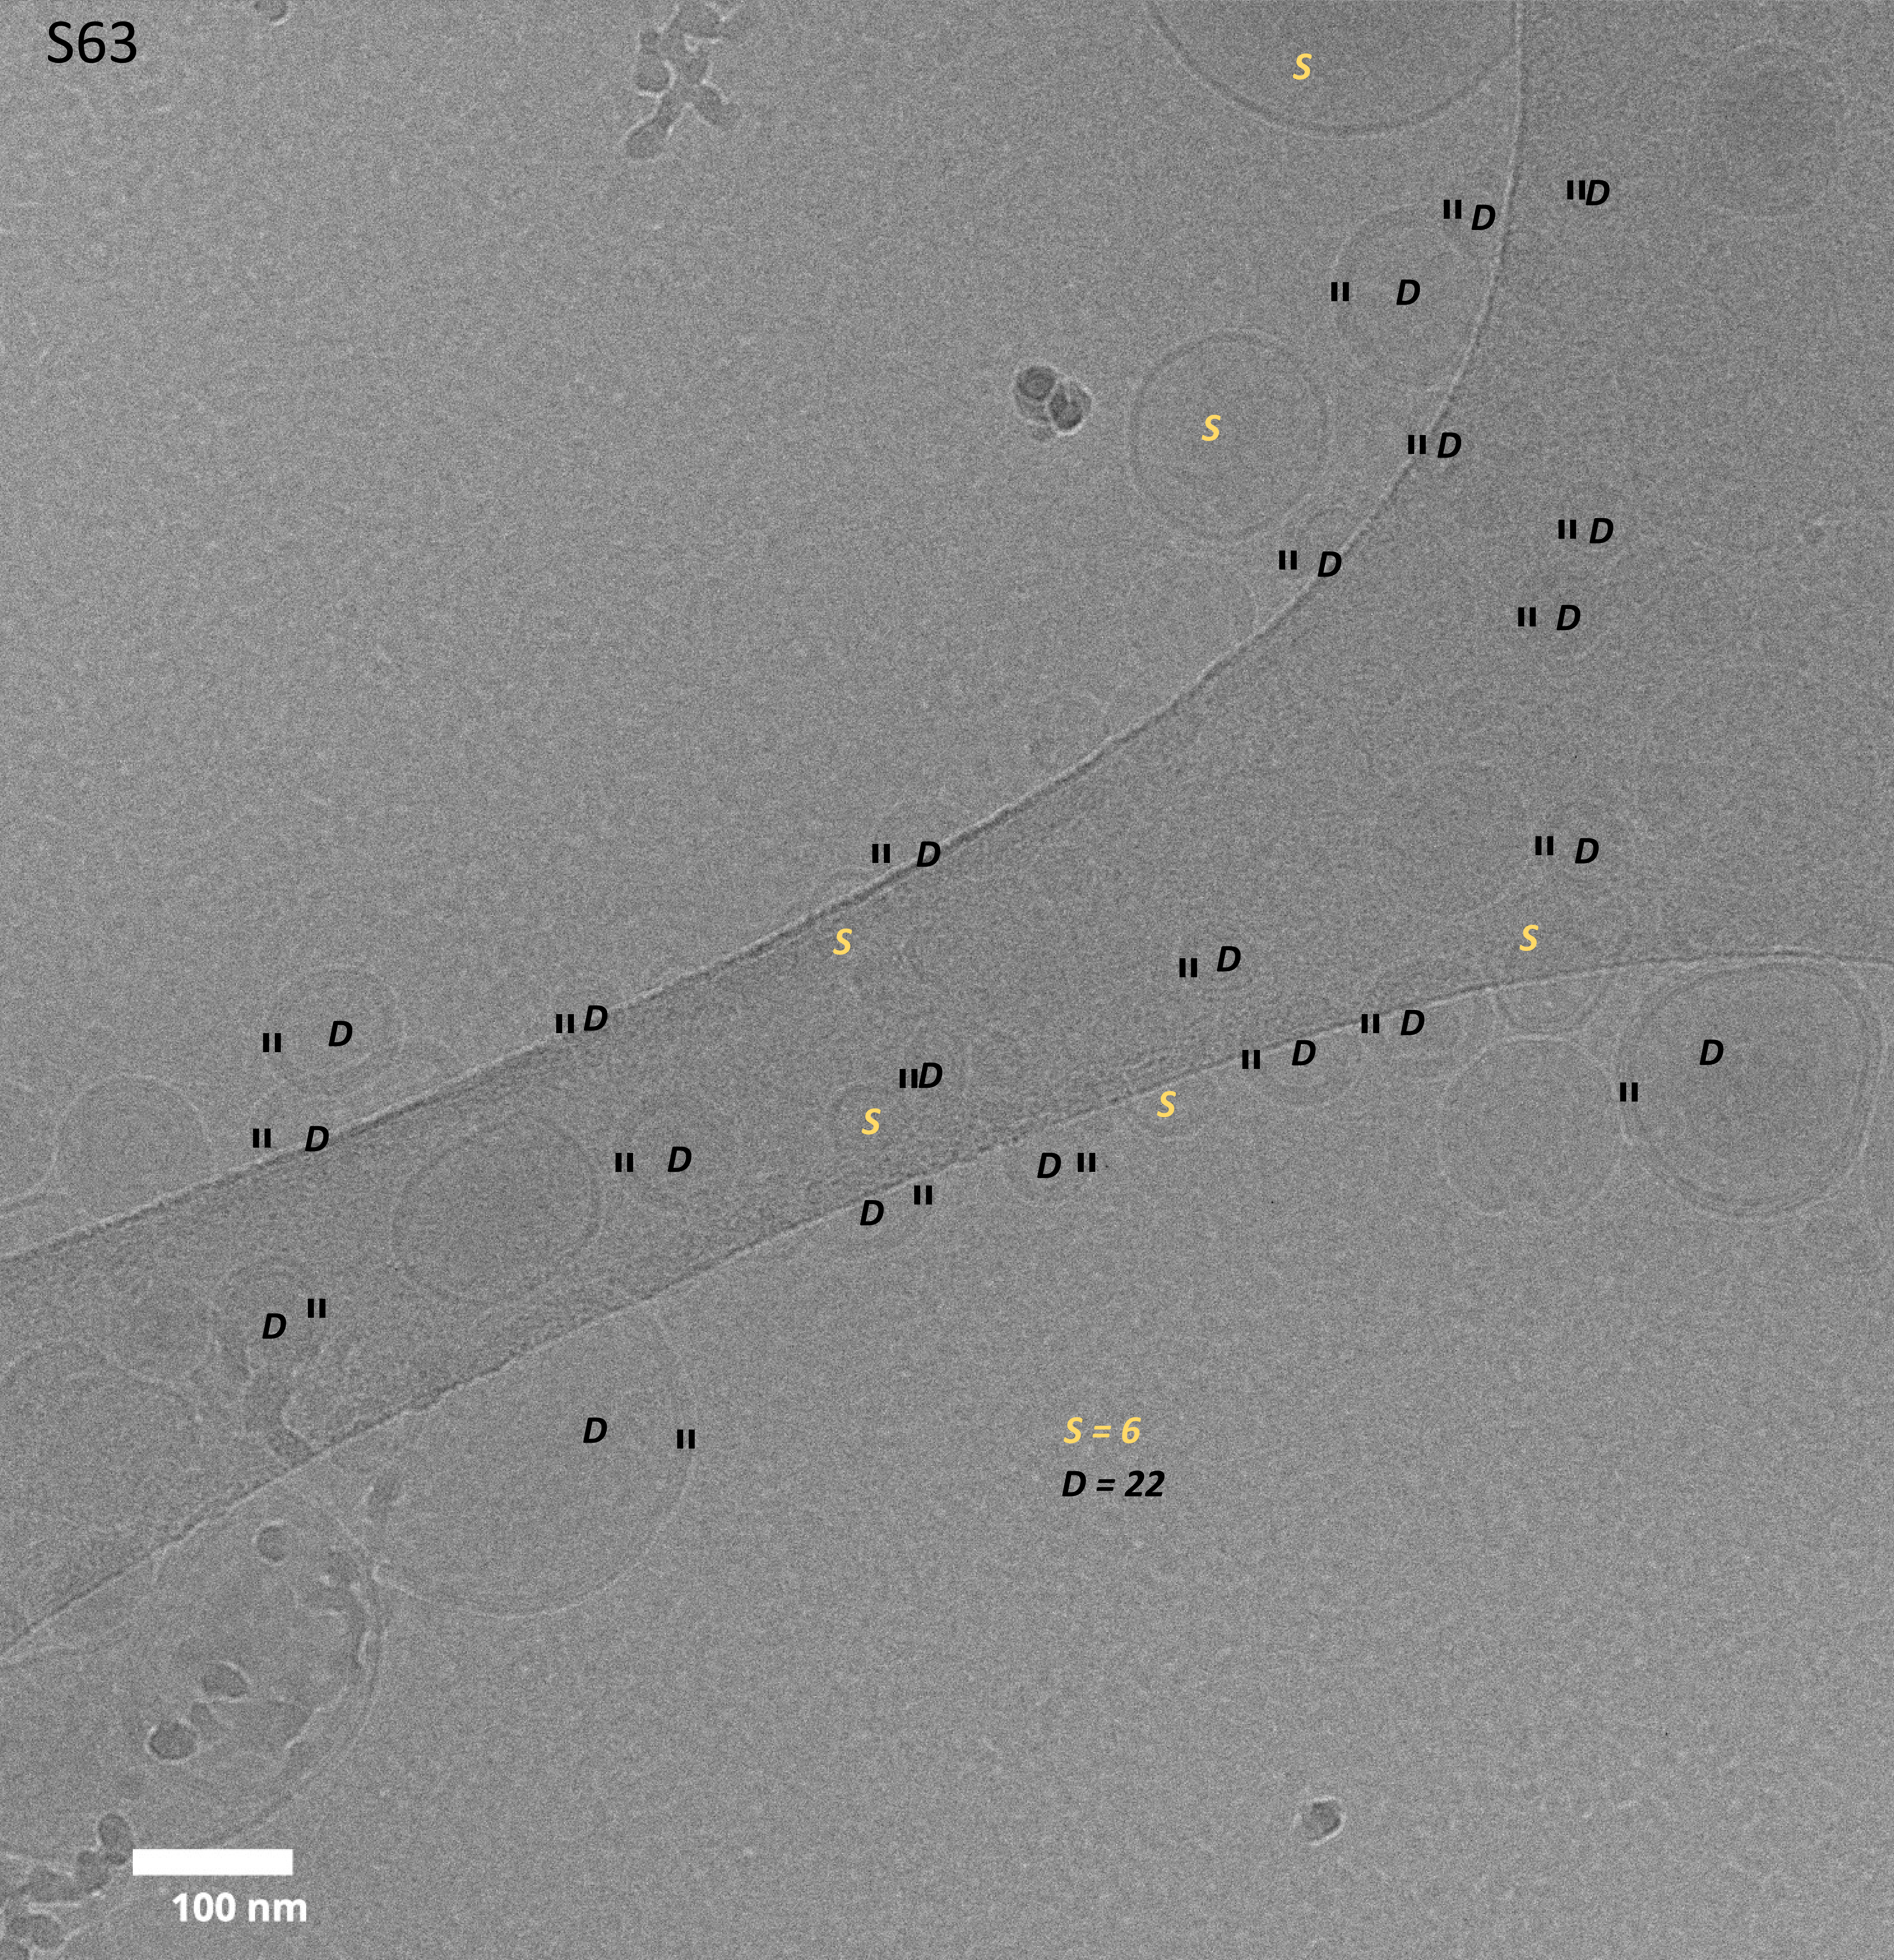

S

IID

IID

II D

S

IID

IID

II D

II D

II D

II D

S

II D

S

II D

IID

II D

IID

II D

IID

II

D

II D

S

S

D II

D II

D II

D II

S = 6

D = 22

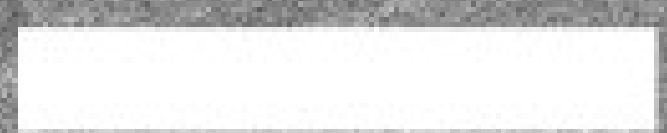

100 nm



S64

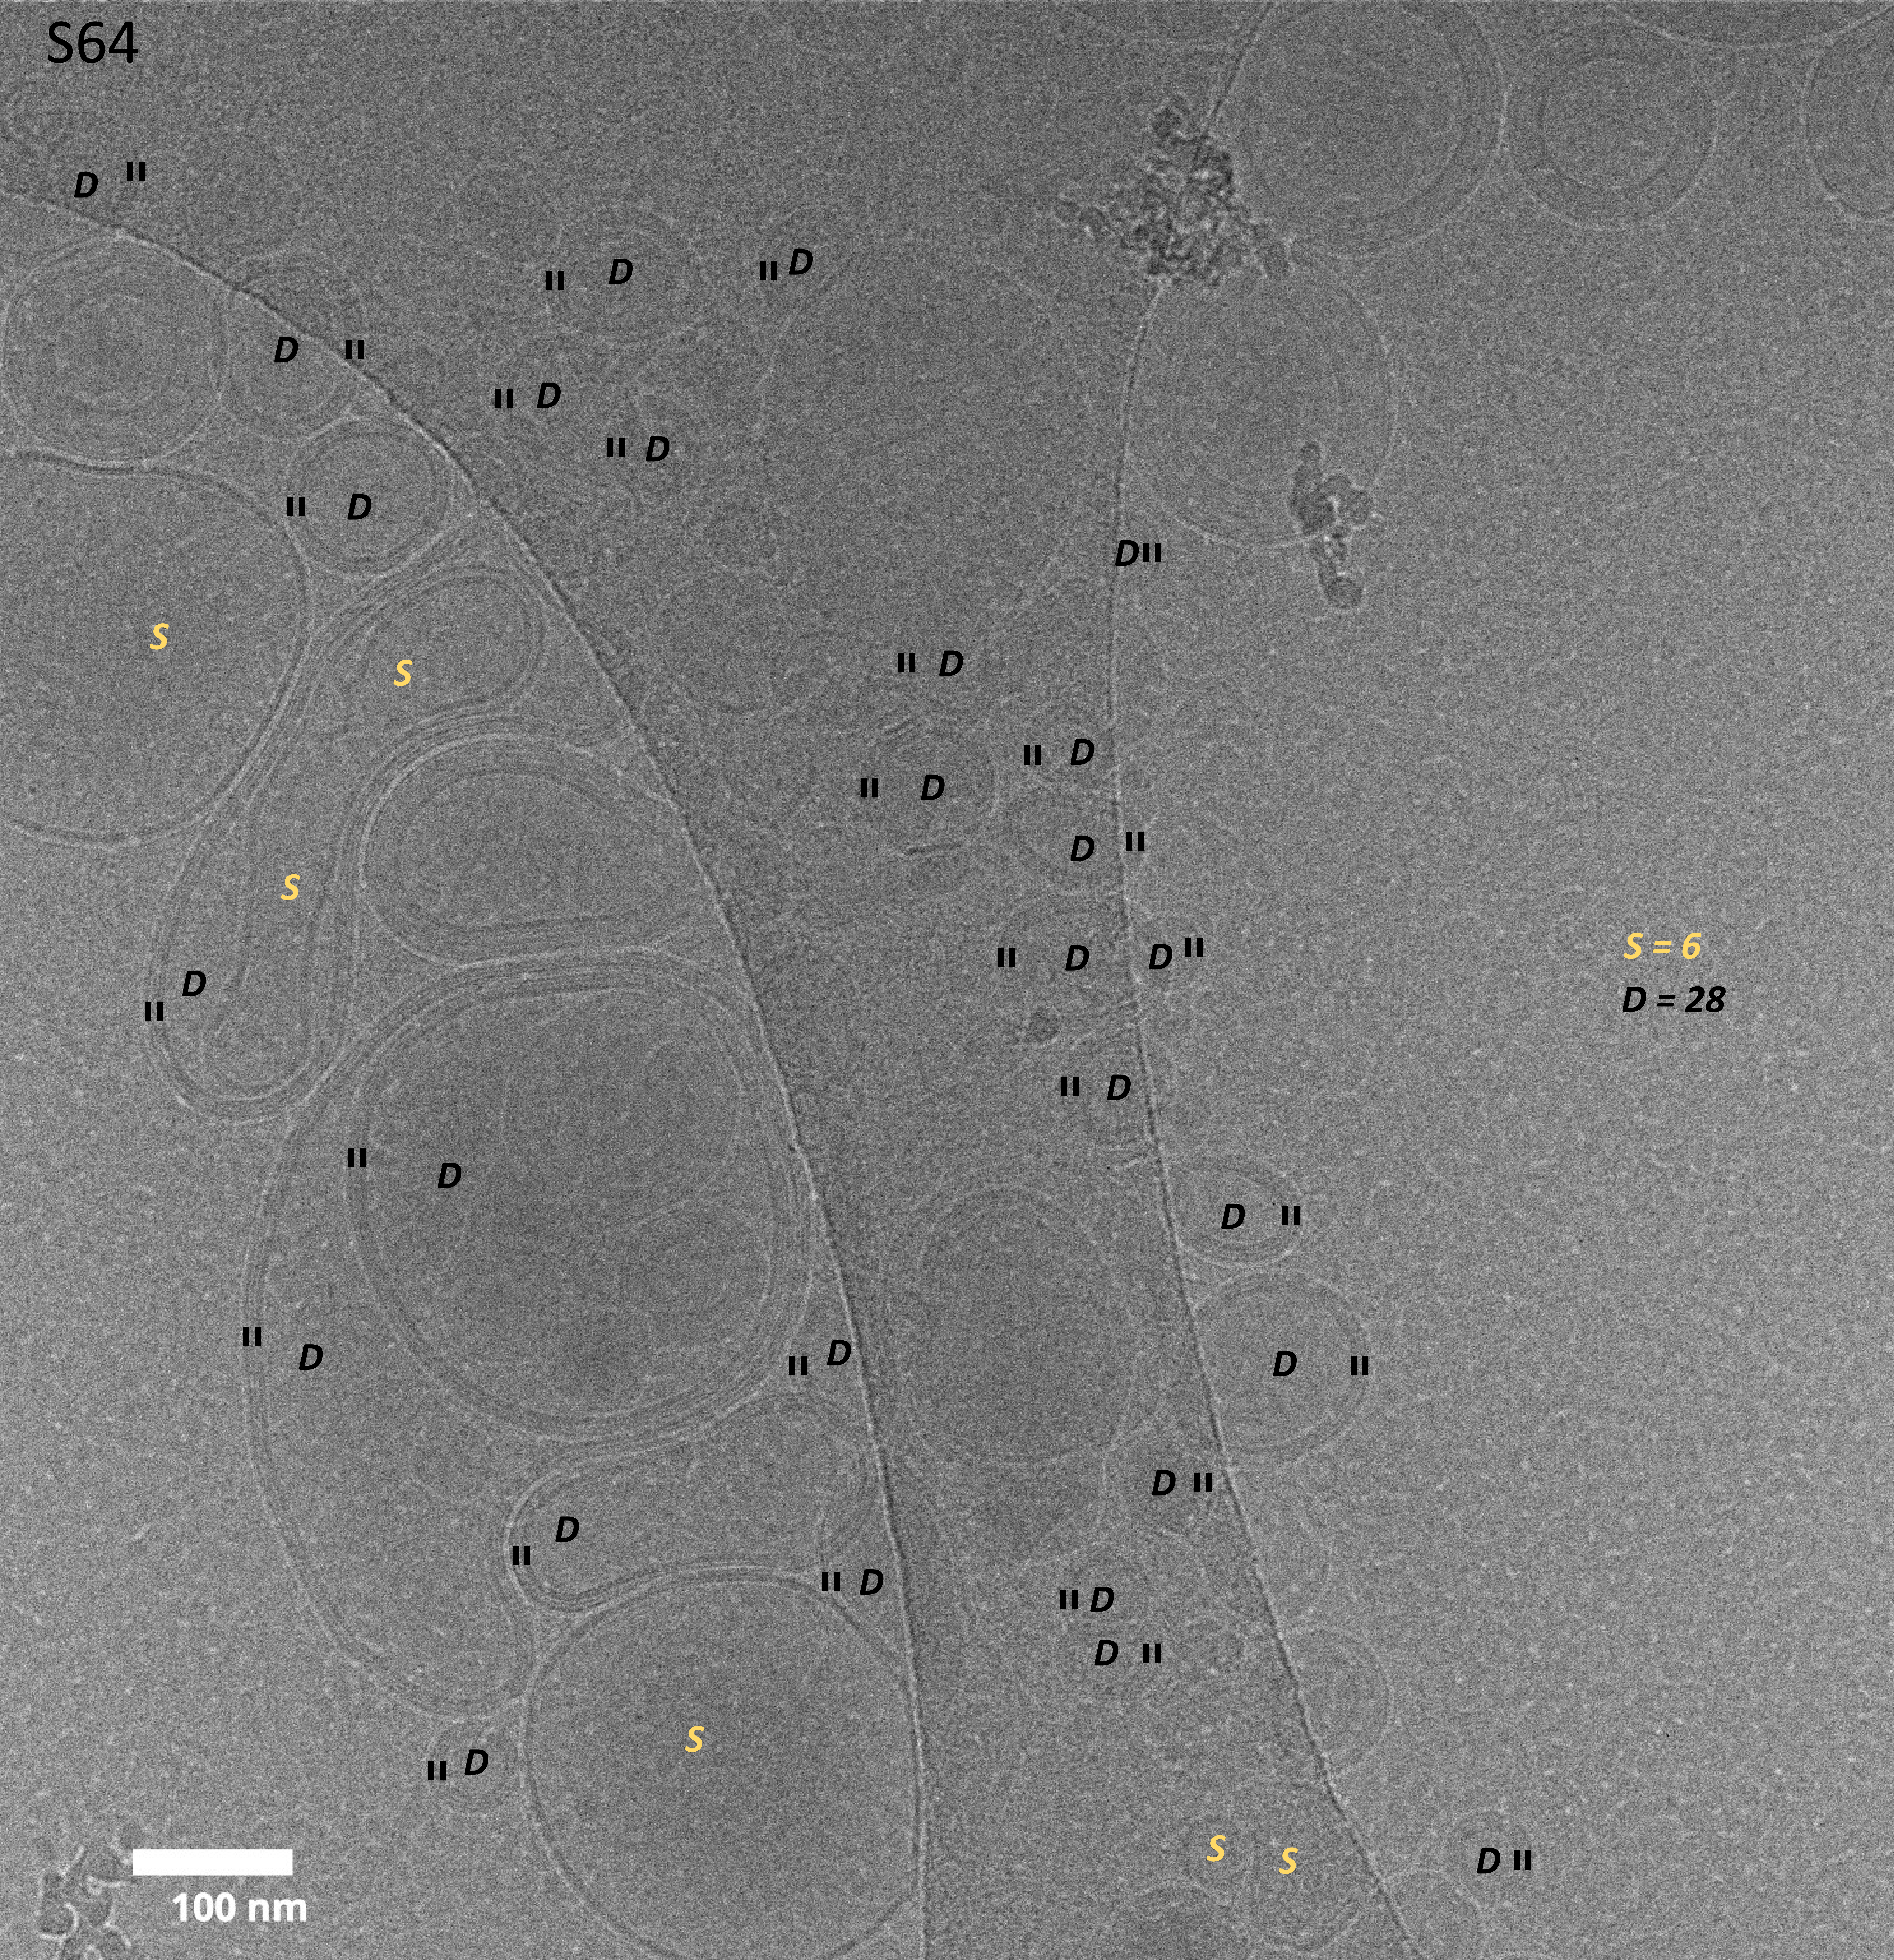

*D* II

II *D* II *D*

*D* II

II *D*

II *D*

II *D*

*D* II

*S*

*S*

II *D*

II *D*

II *D*

*D* II

*S*

II *D* *D* II

II *D*

*S* = 6  
*D* = 28

II *D*

II *D*

*D* II

II *D*

II *D*

*D* II

II *D*

*D* II

II *D*

II *D*

*D* II

II *D*

*S*

*S*

*S*

*D* II

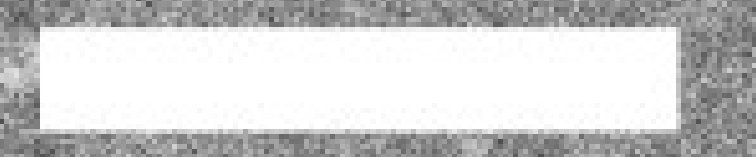

100 nm



S65

100 nm

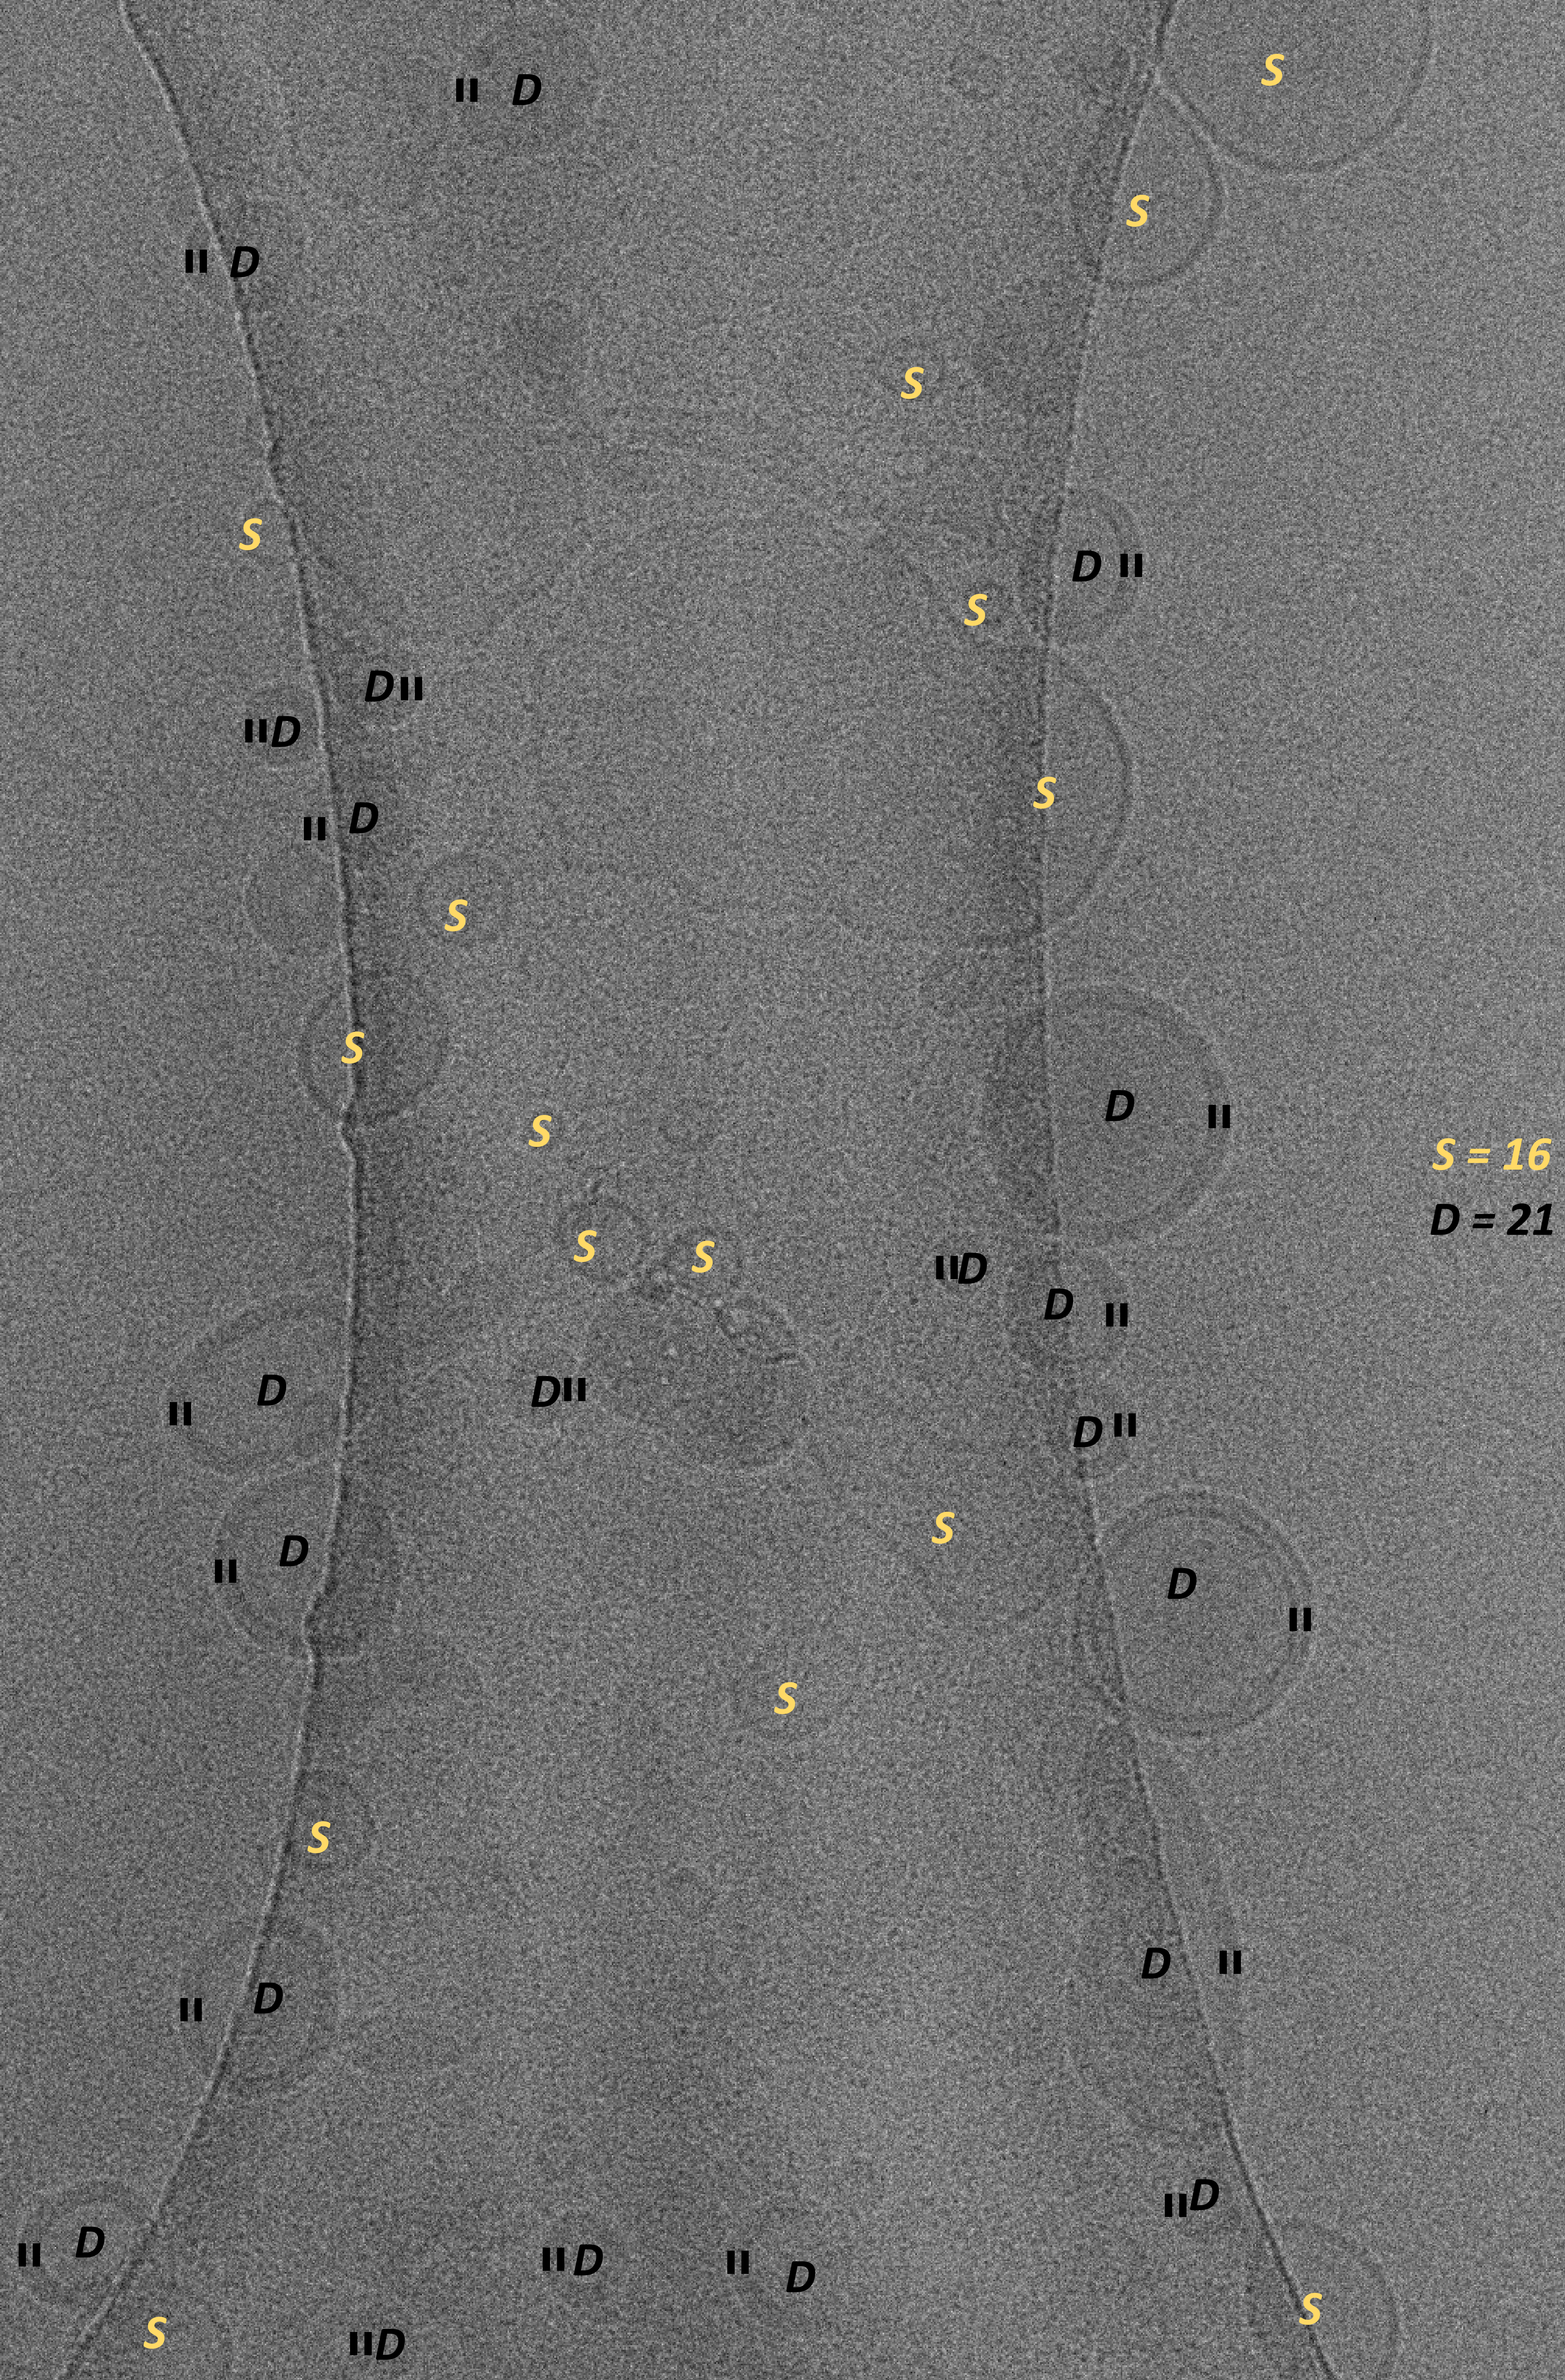



S66

$S = 8$   
 $D = 35$

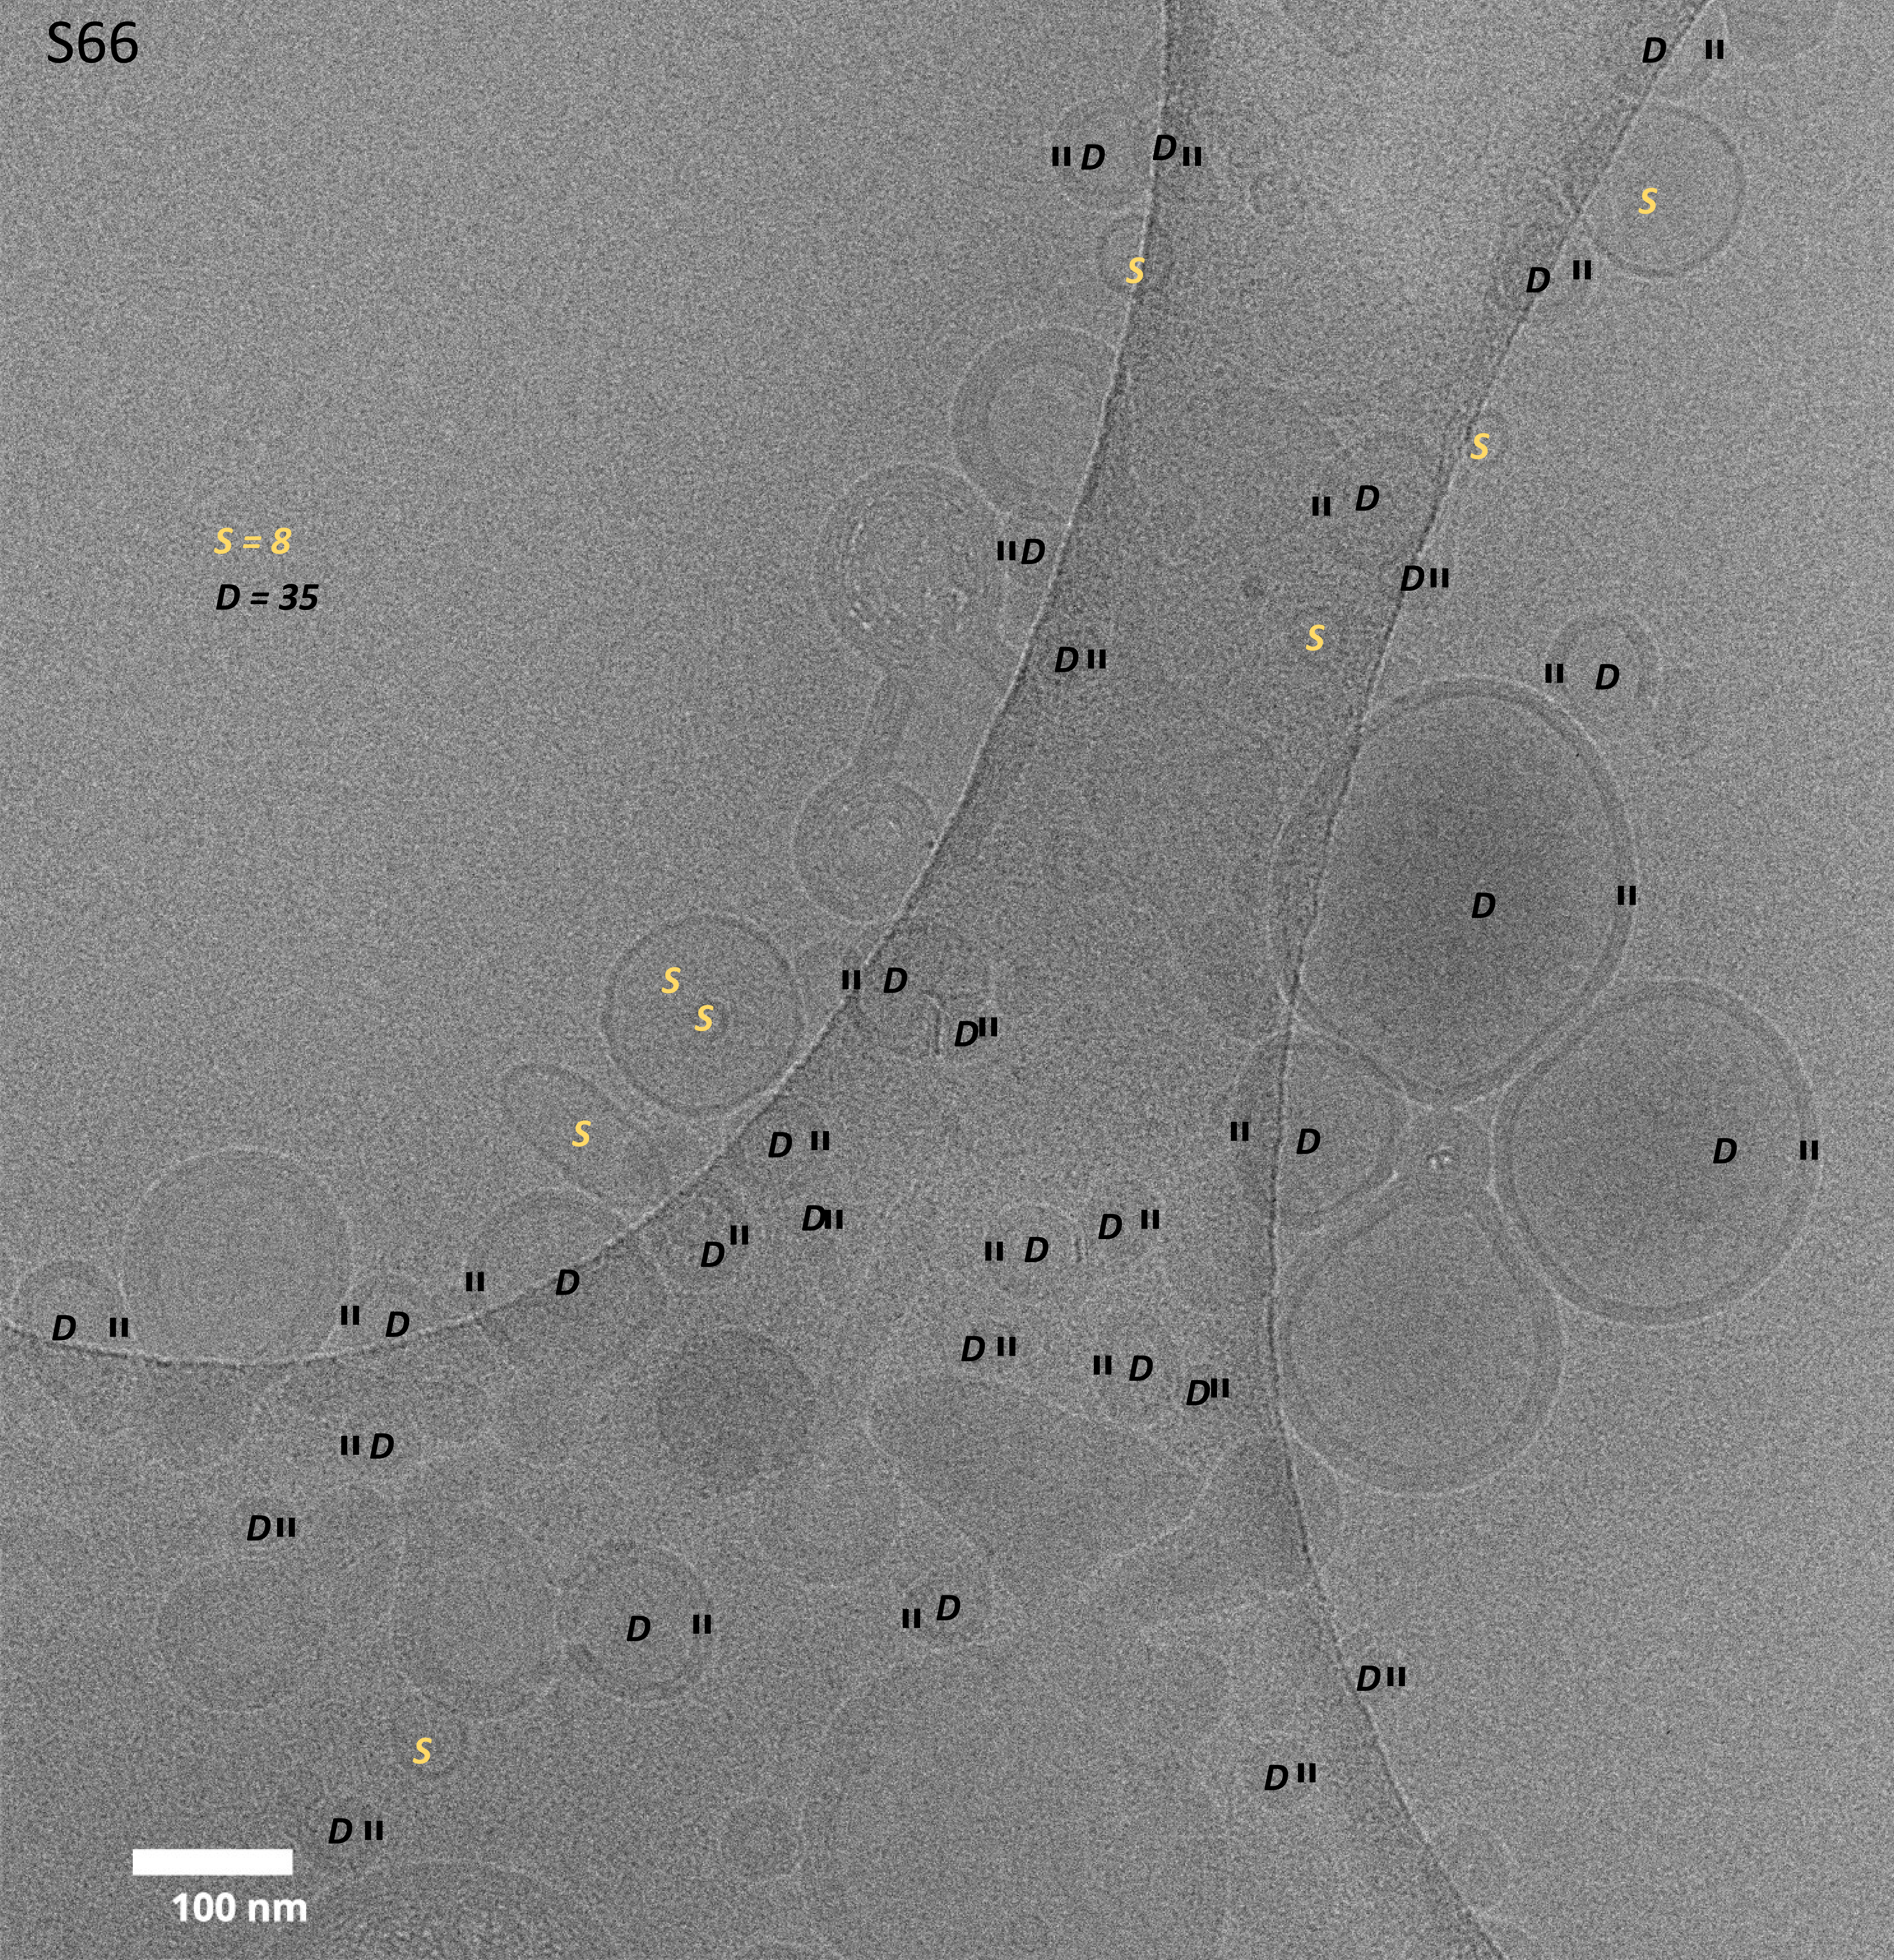

100 nm



S21

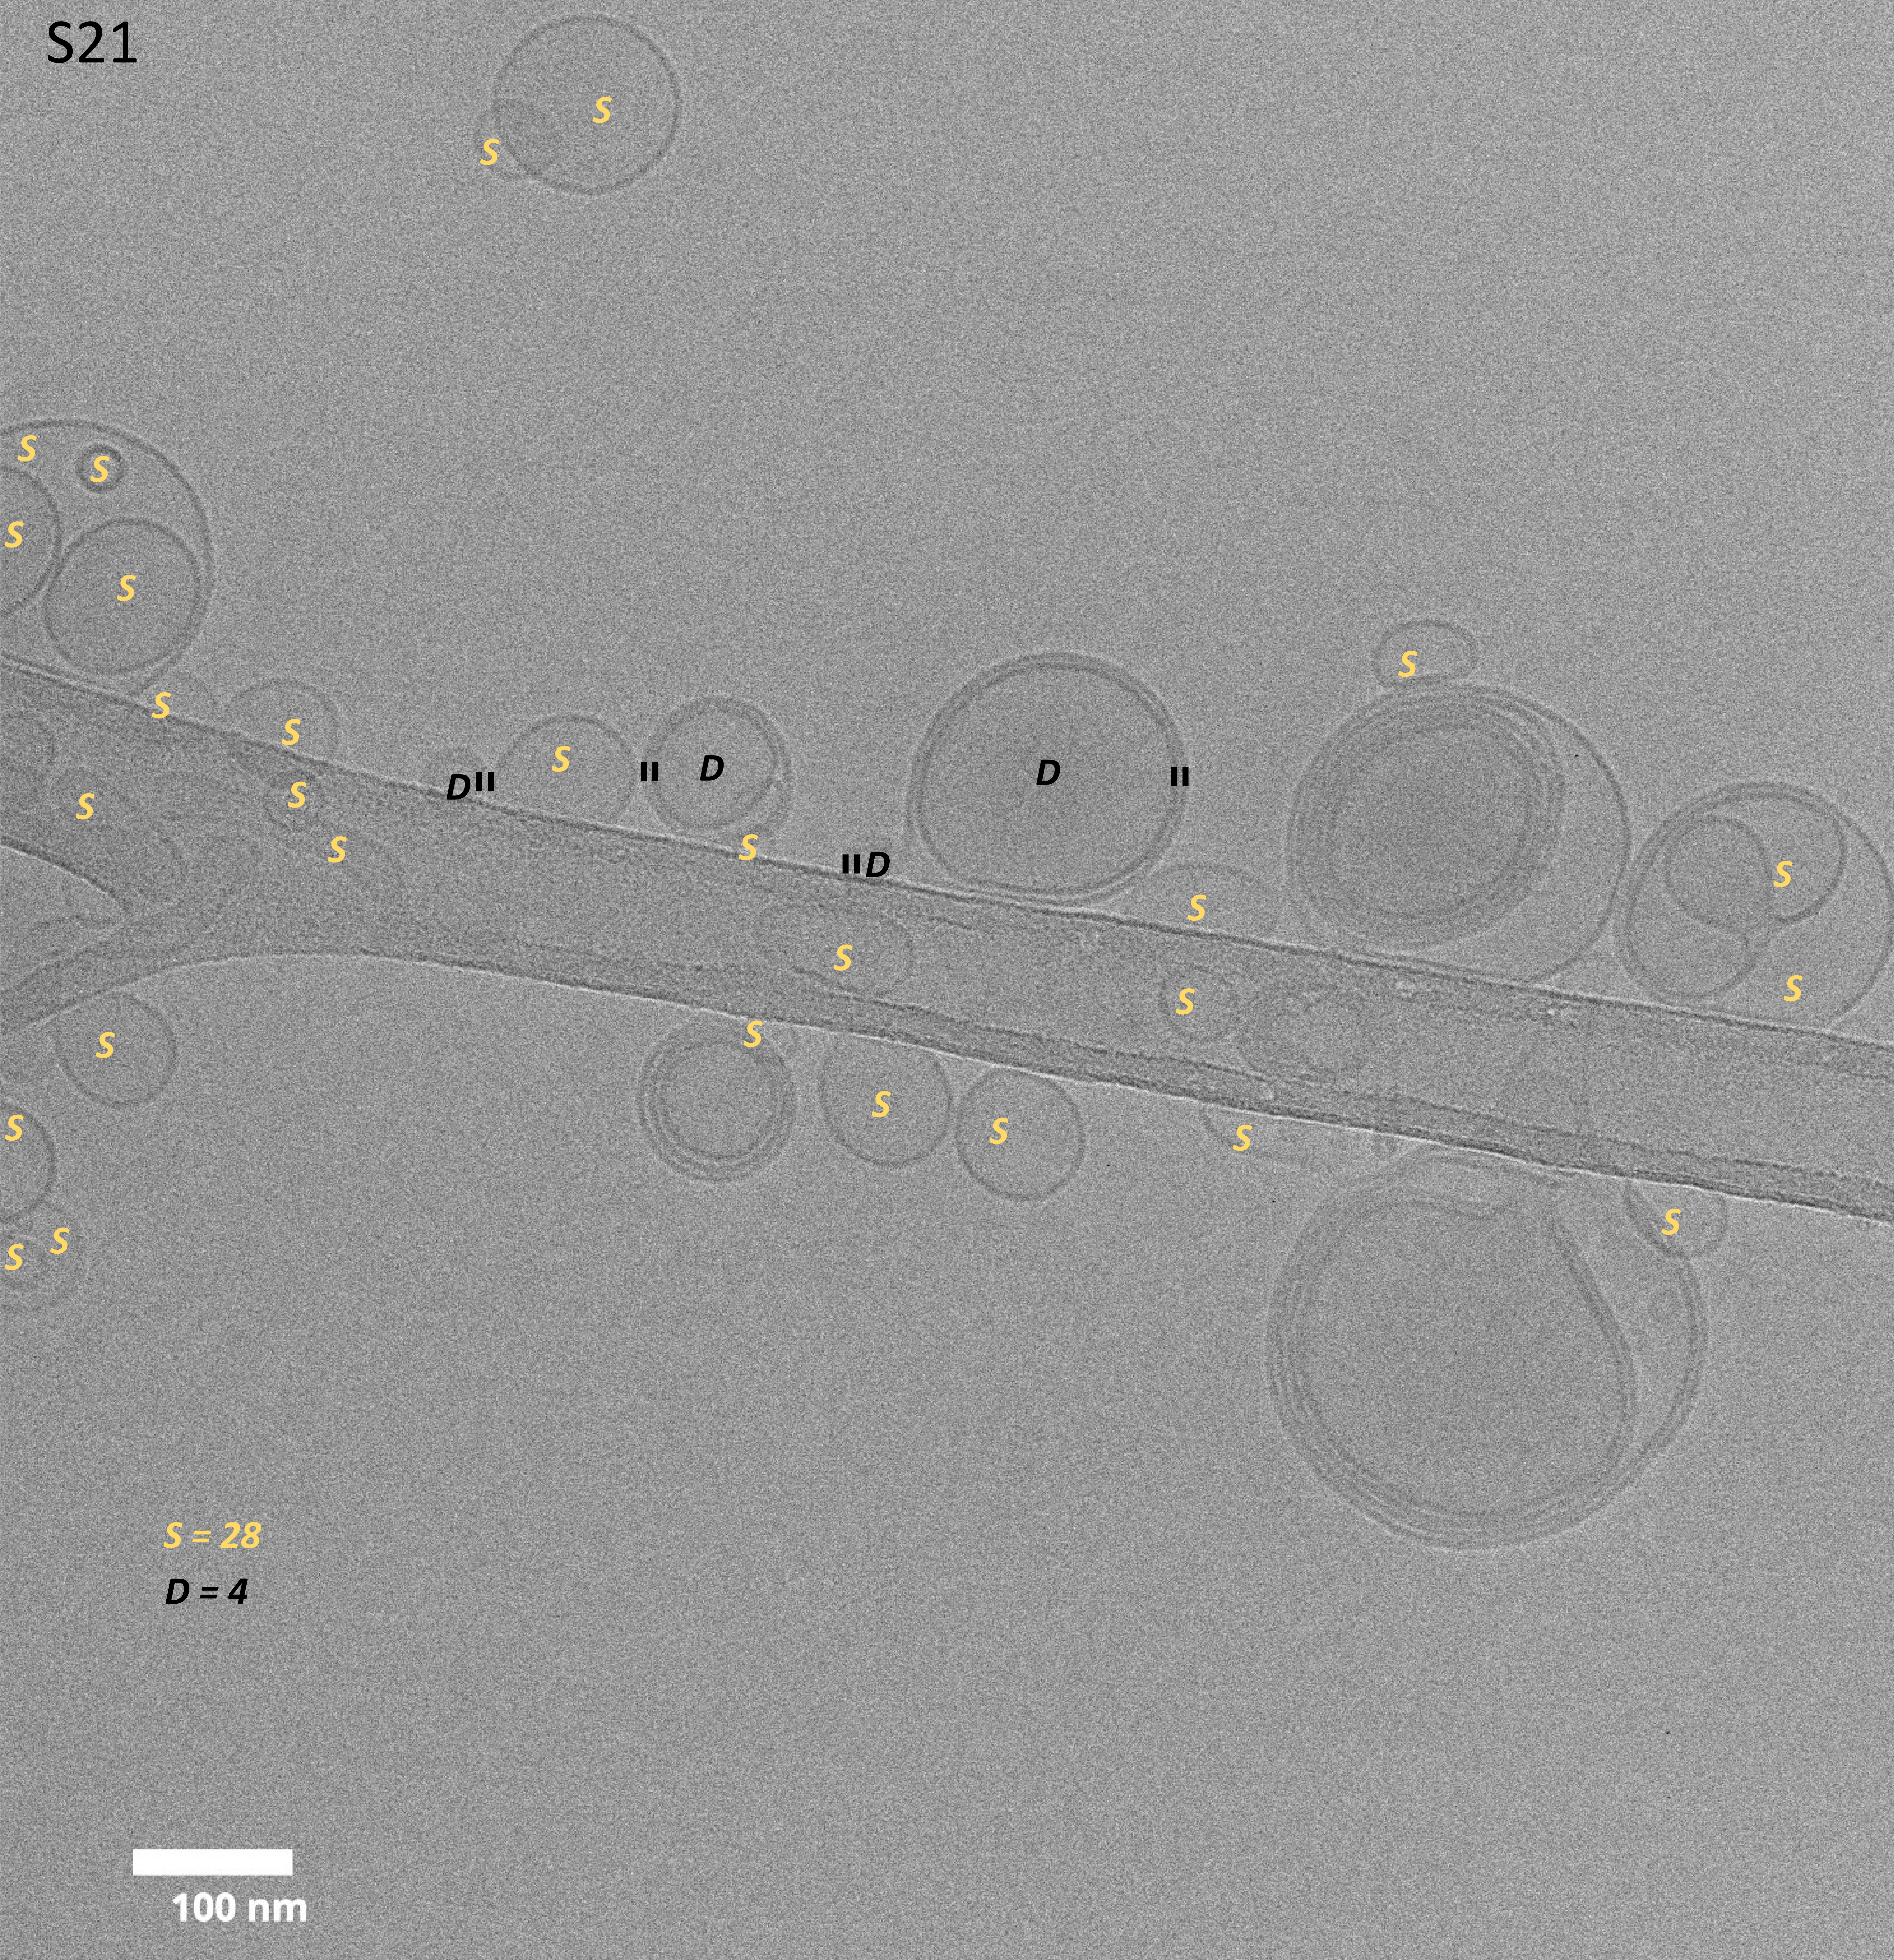

$S = 28$

$D = 4$

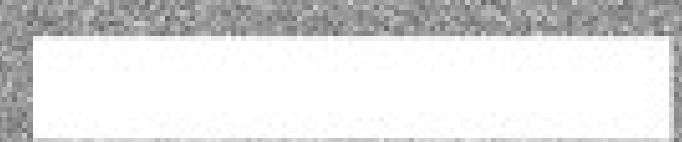

100 nm



S22

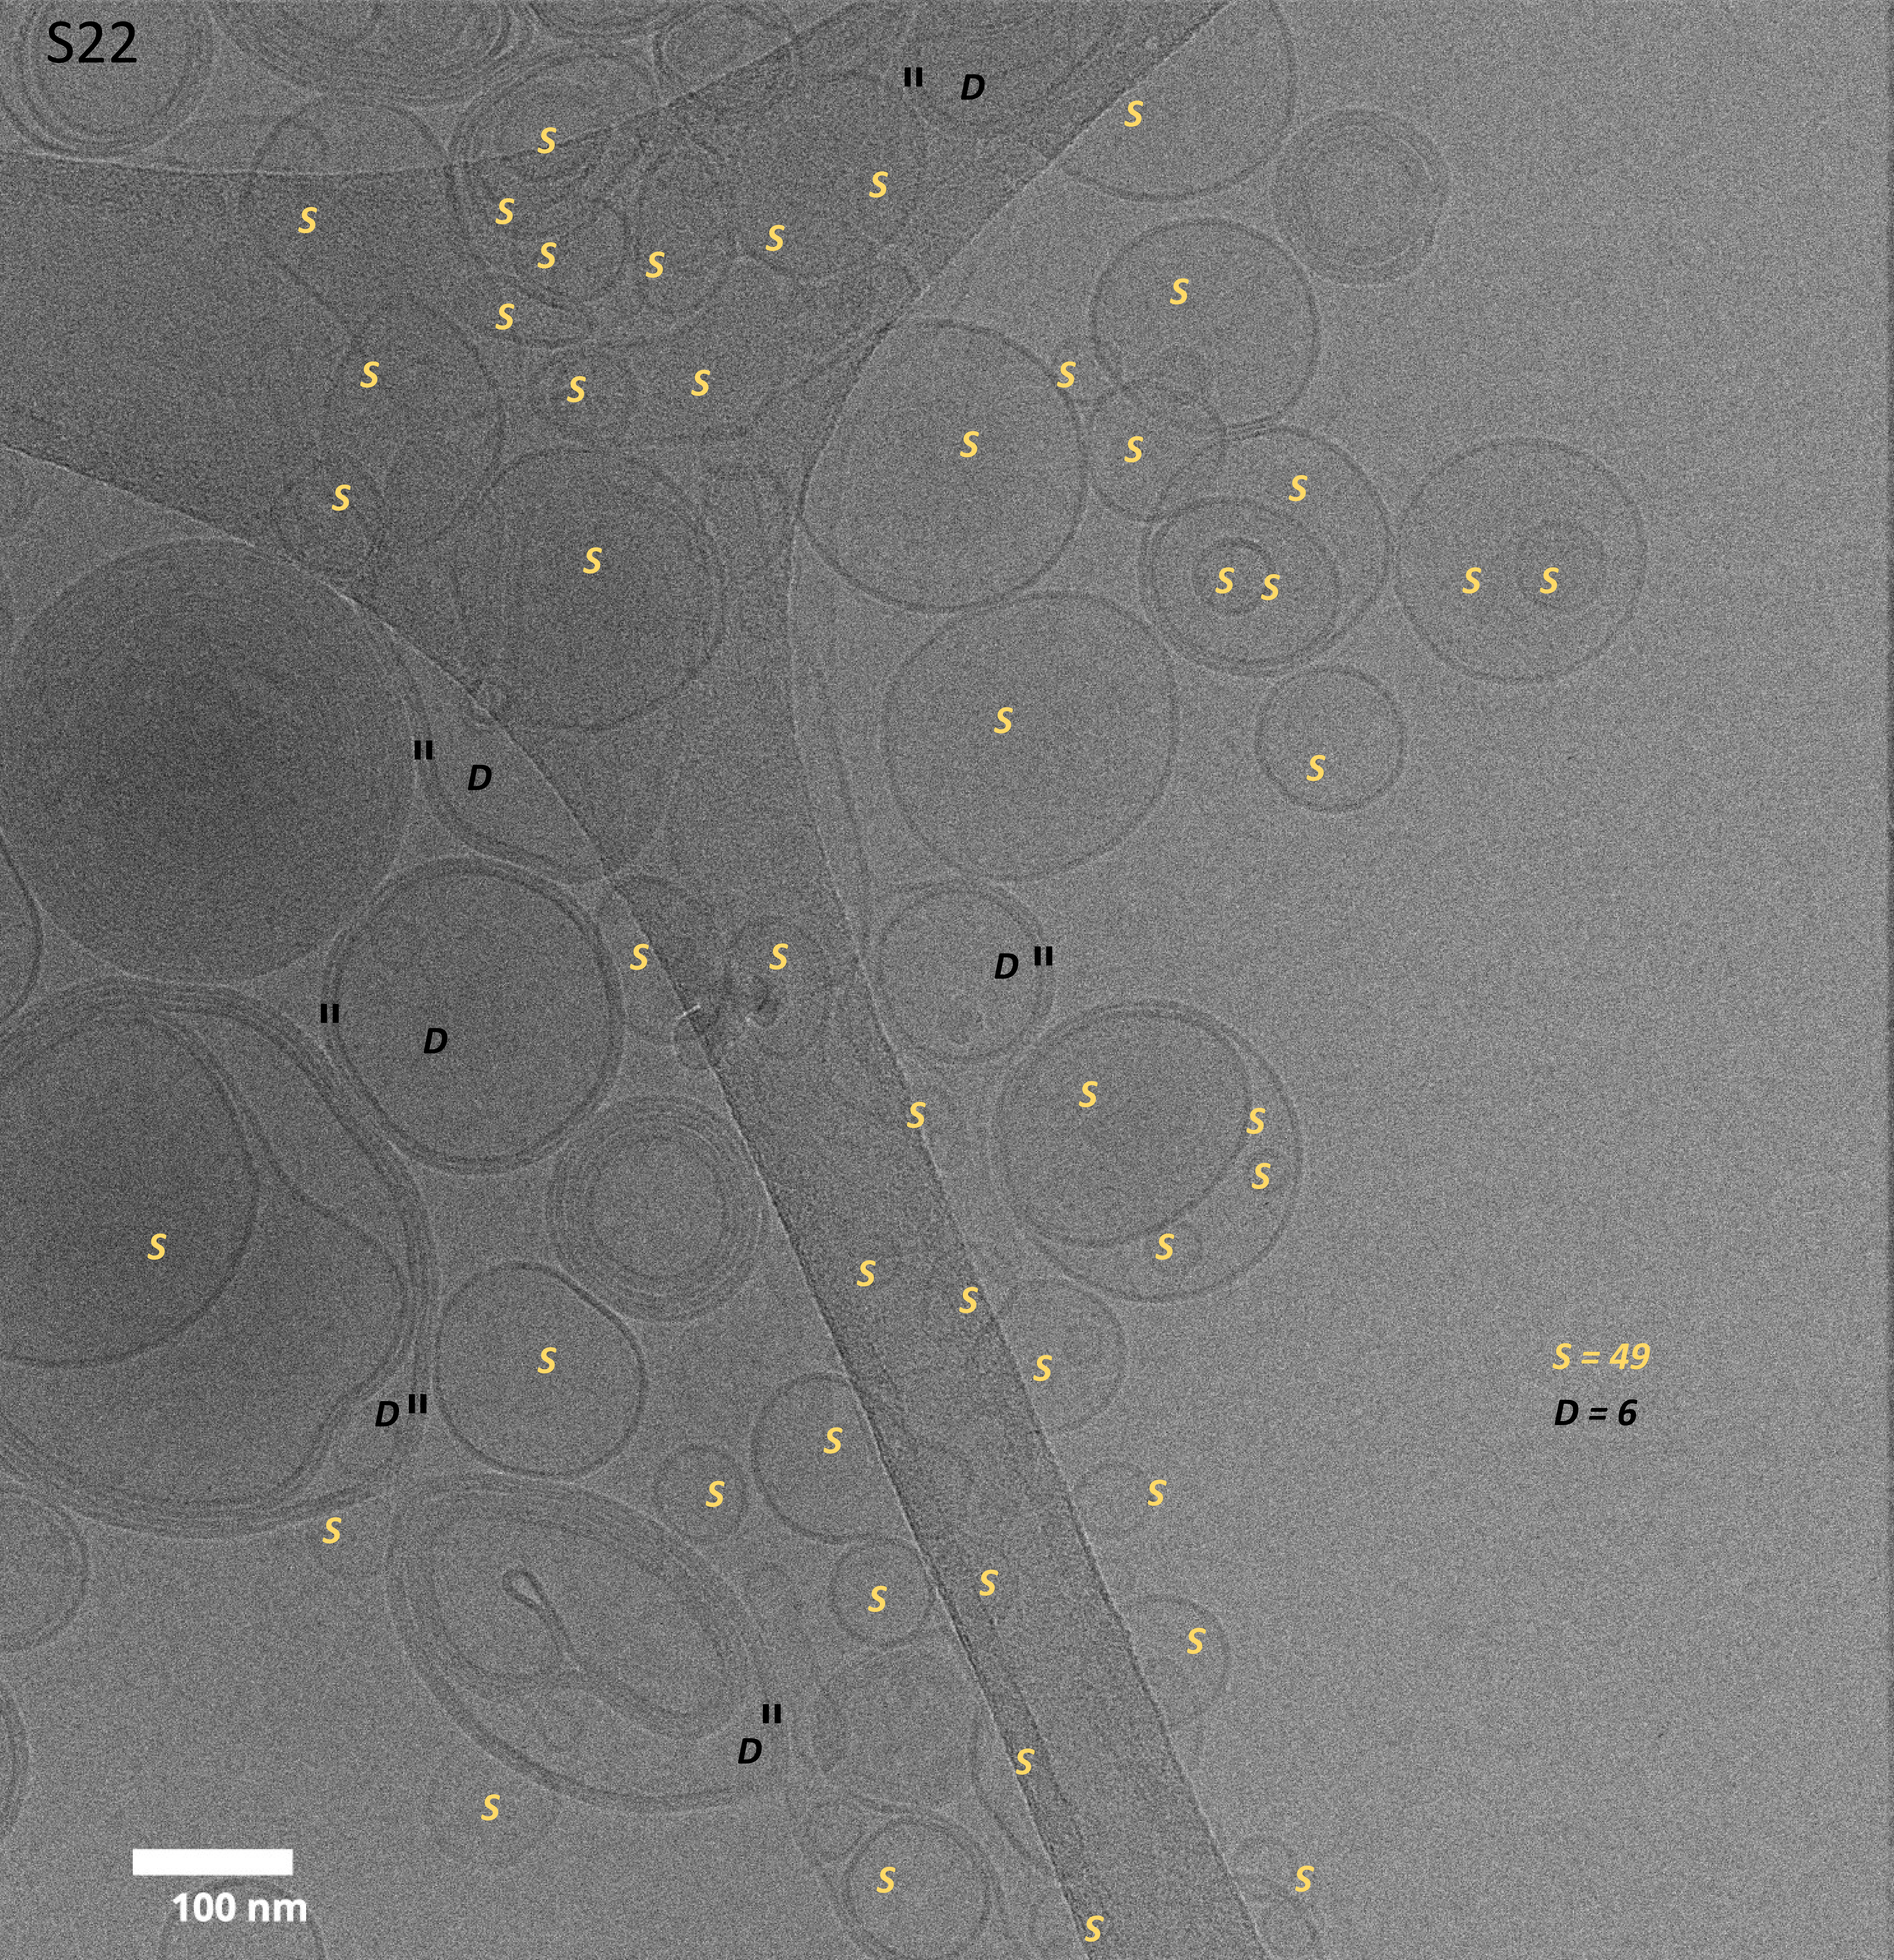

|| D

S

S

S

S

S

S

S

S

S

S

S

S

S

S

S

S

S

S

S

S

S

S

||

D

S

S

S

S

D ||

||

D

S

S

S

S

S

S

S

S

S

D ||

S

S

S

S

S

S

S

S

S

||  
D

S

S

S

S

S

S = 49

D = 6

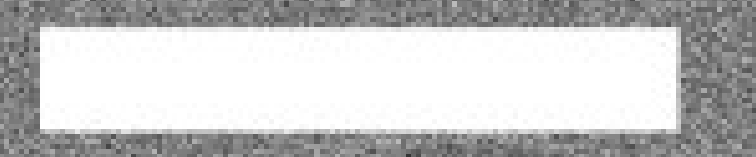

100 nm



S23

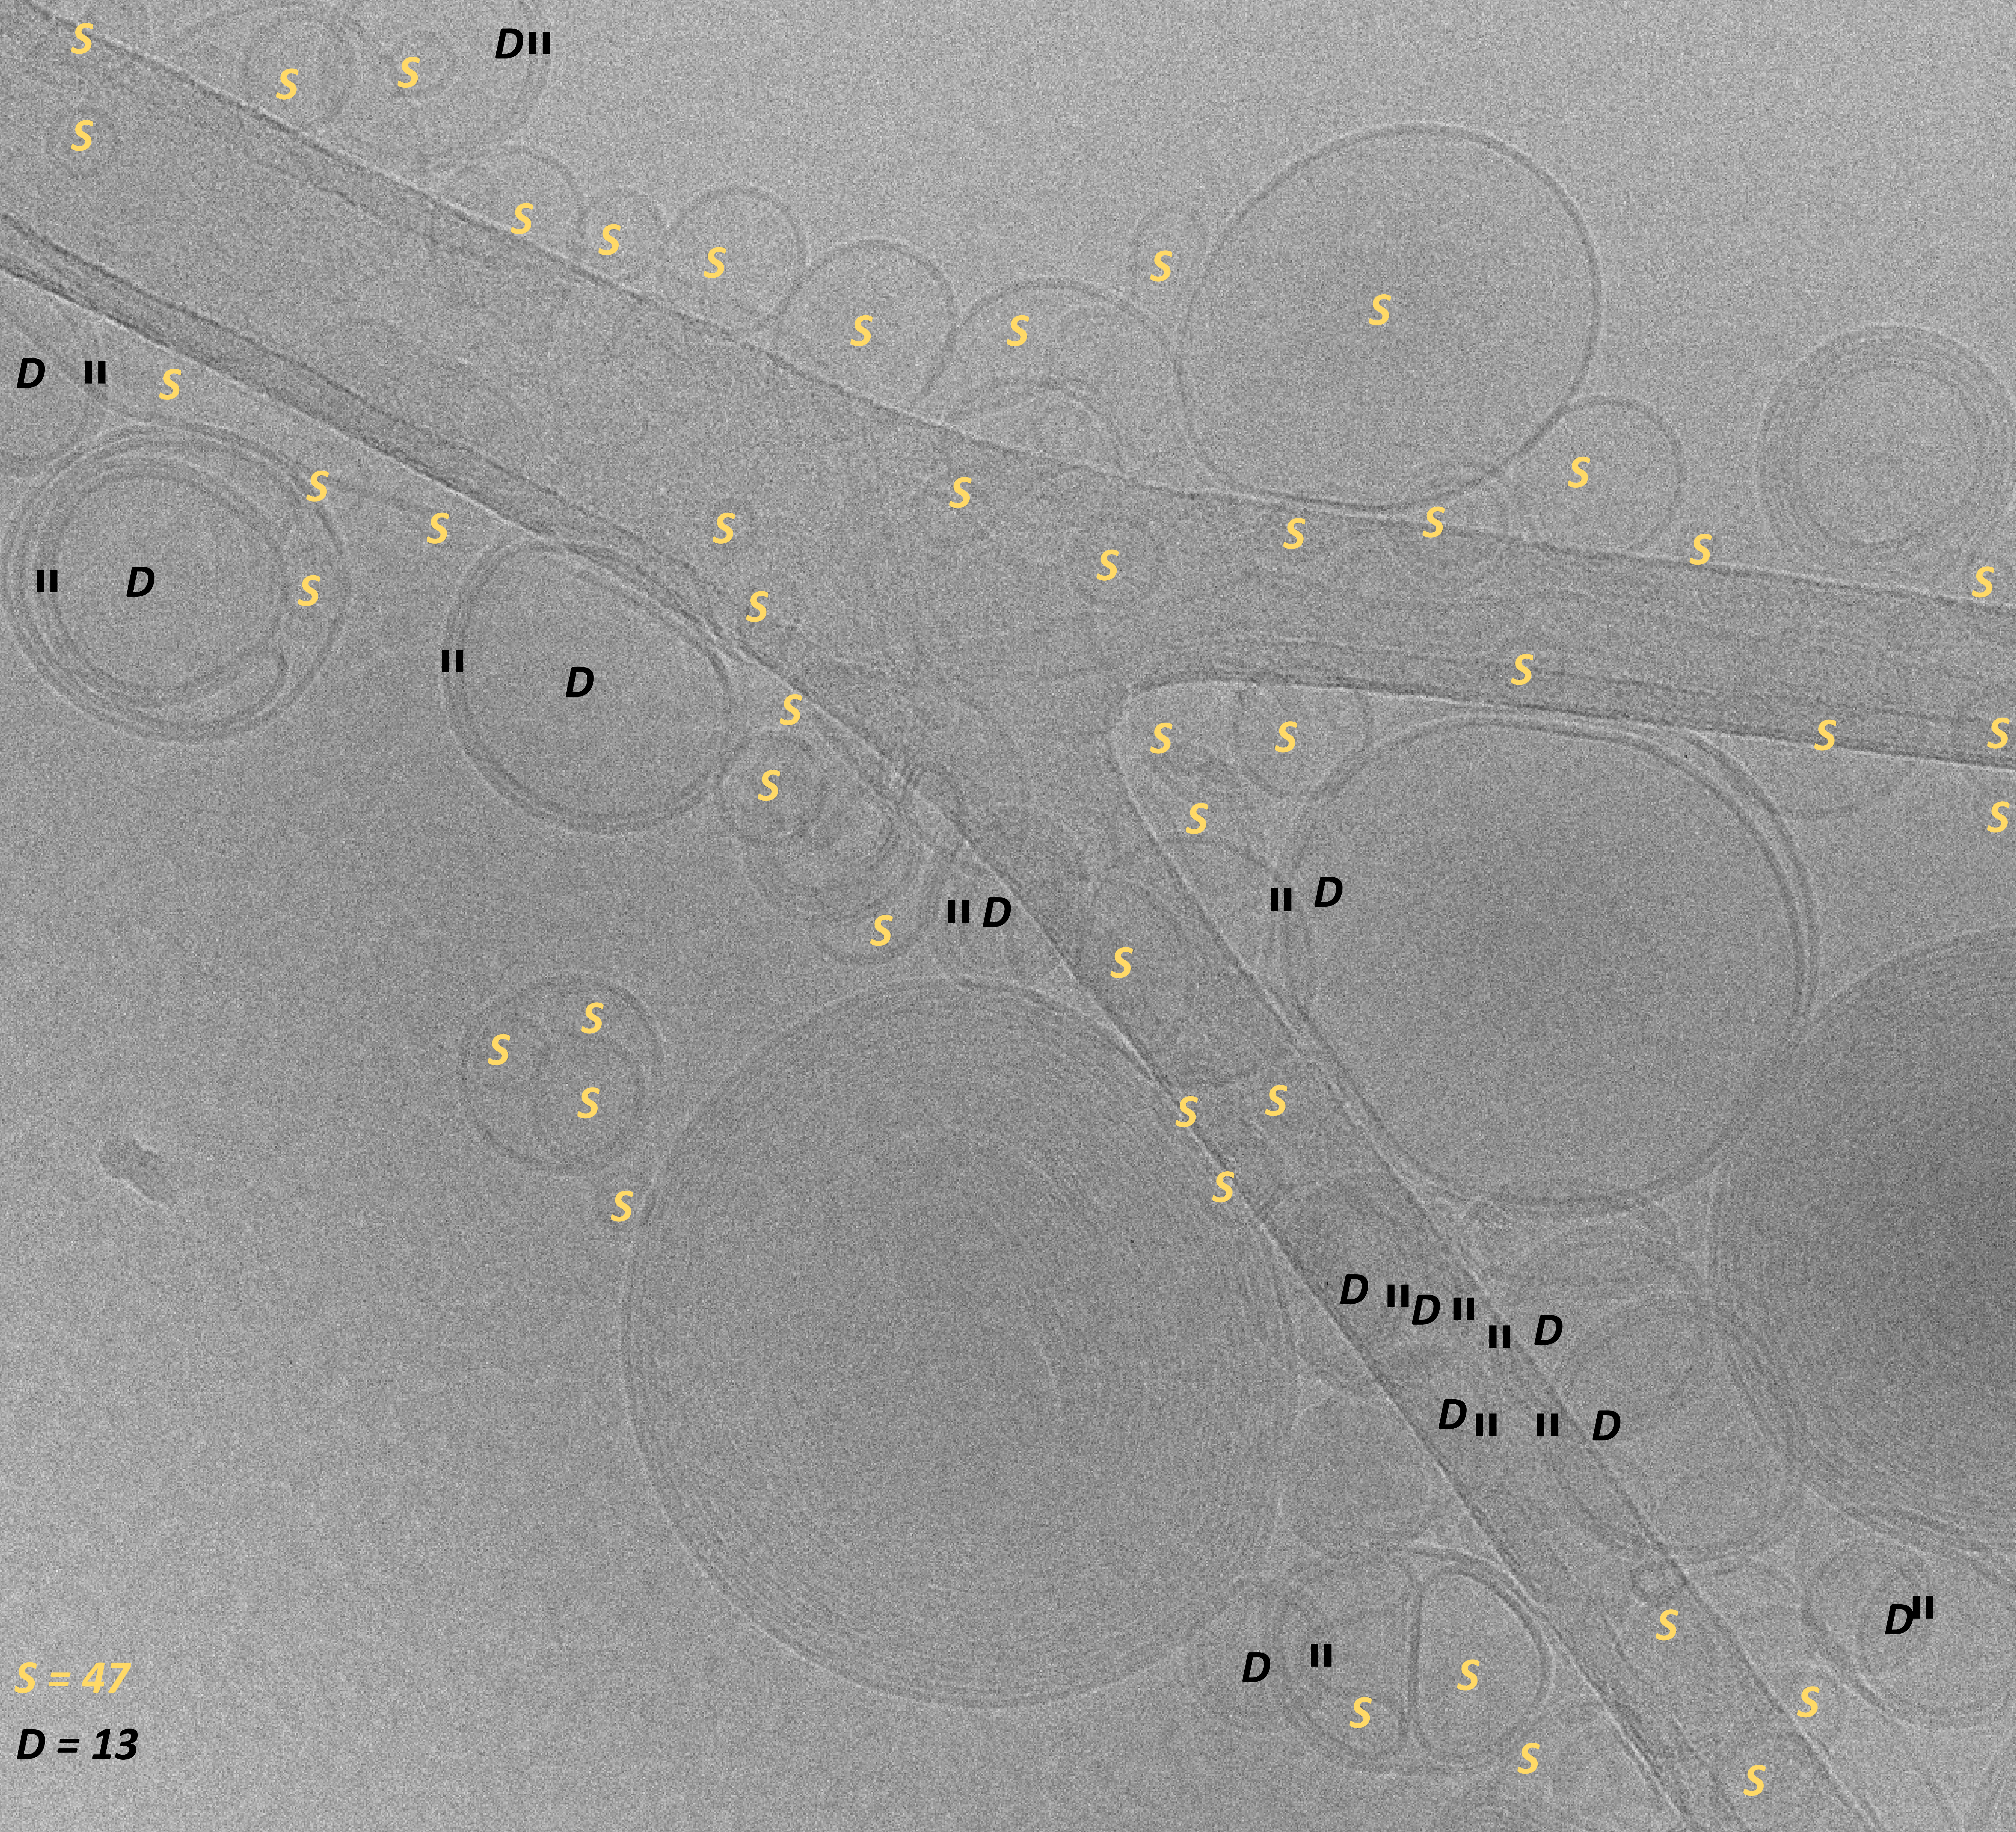

**S = 47**  
**D = 13**



S24

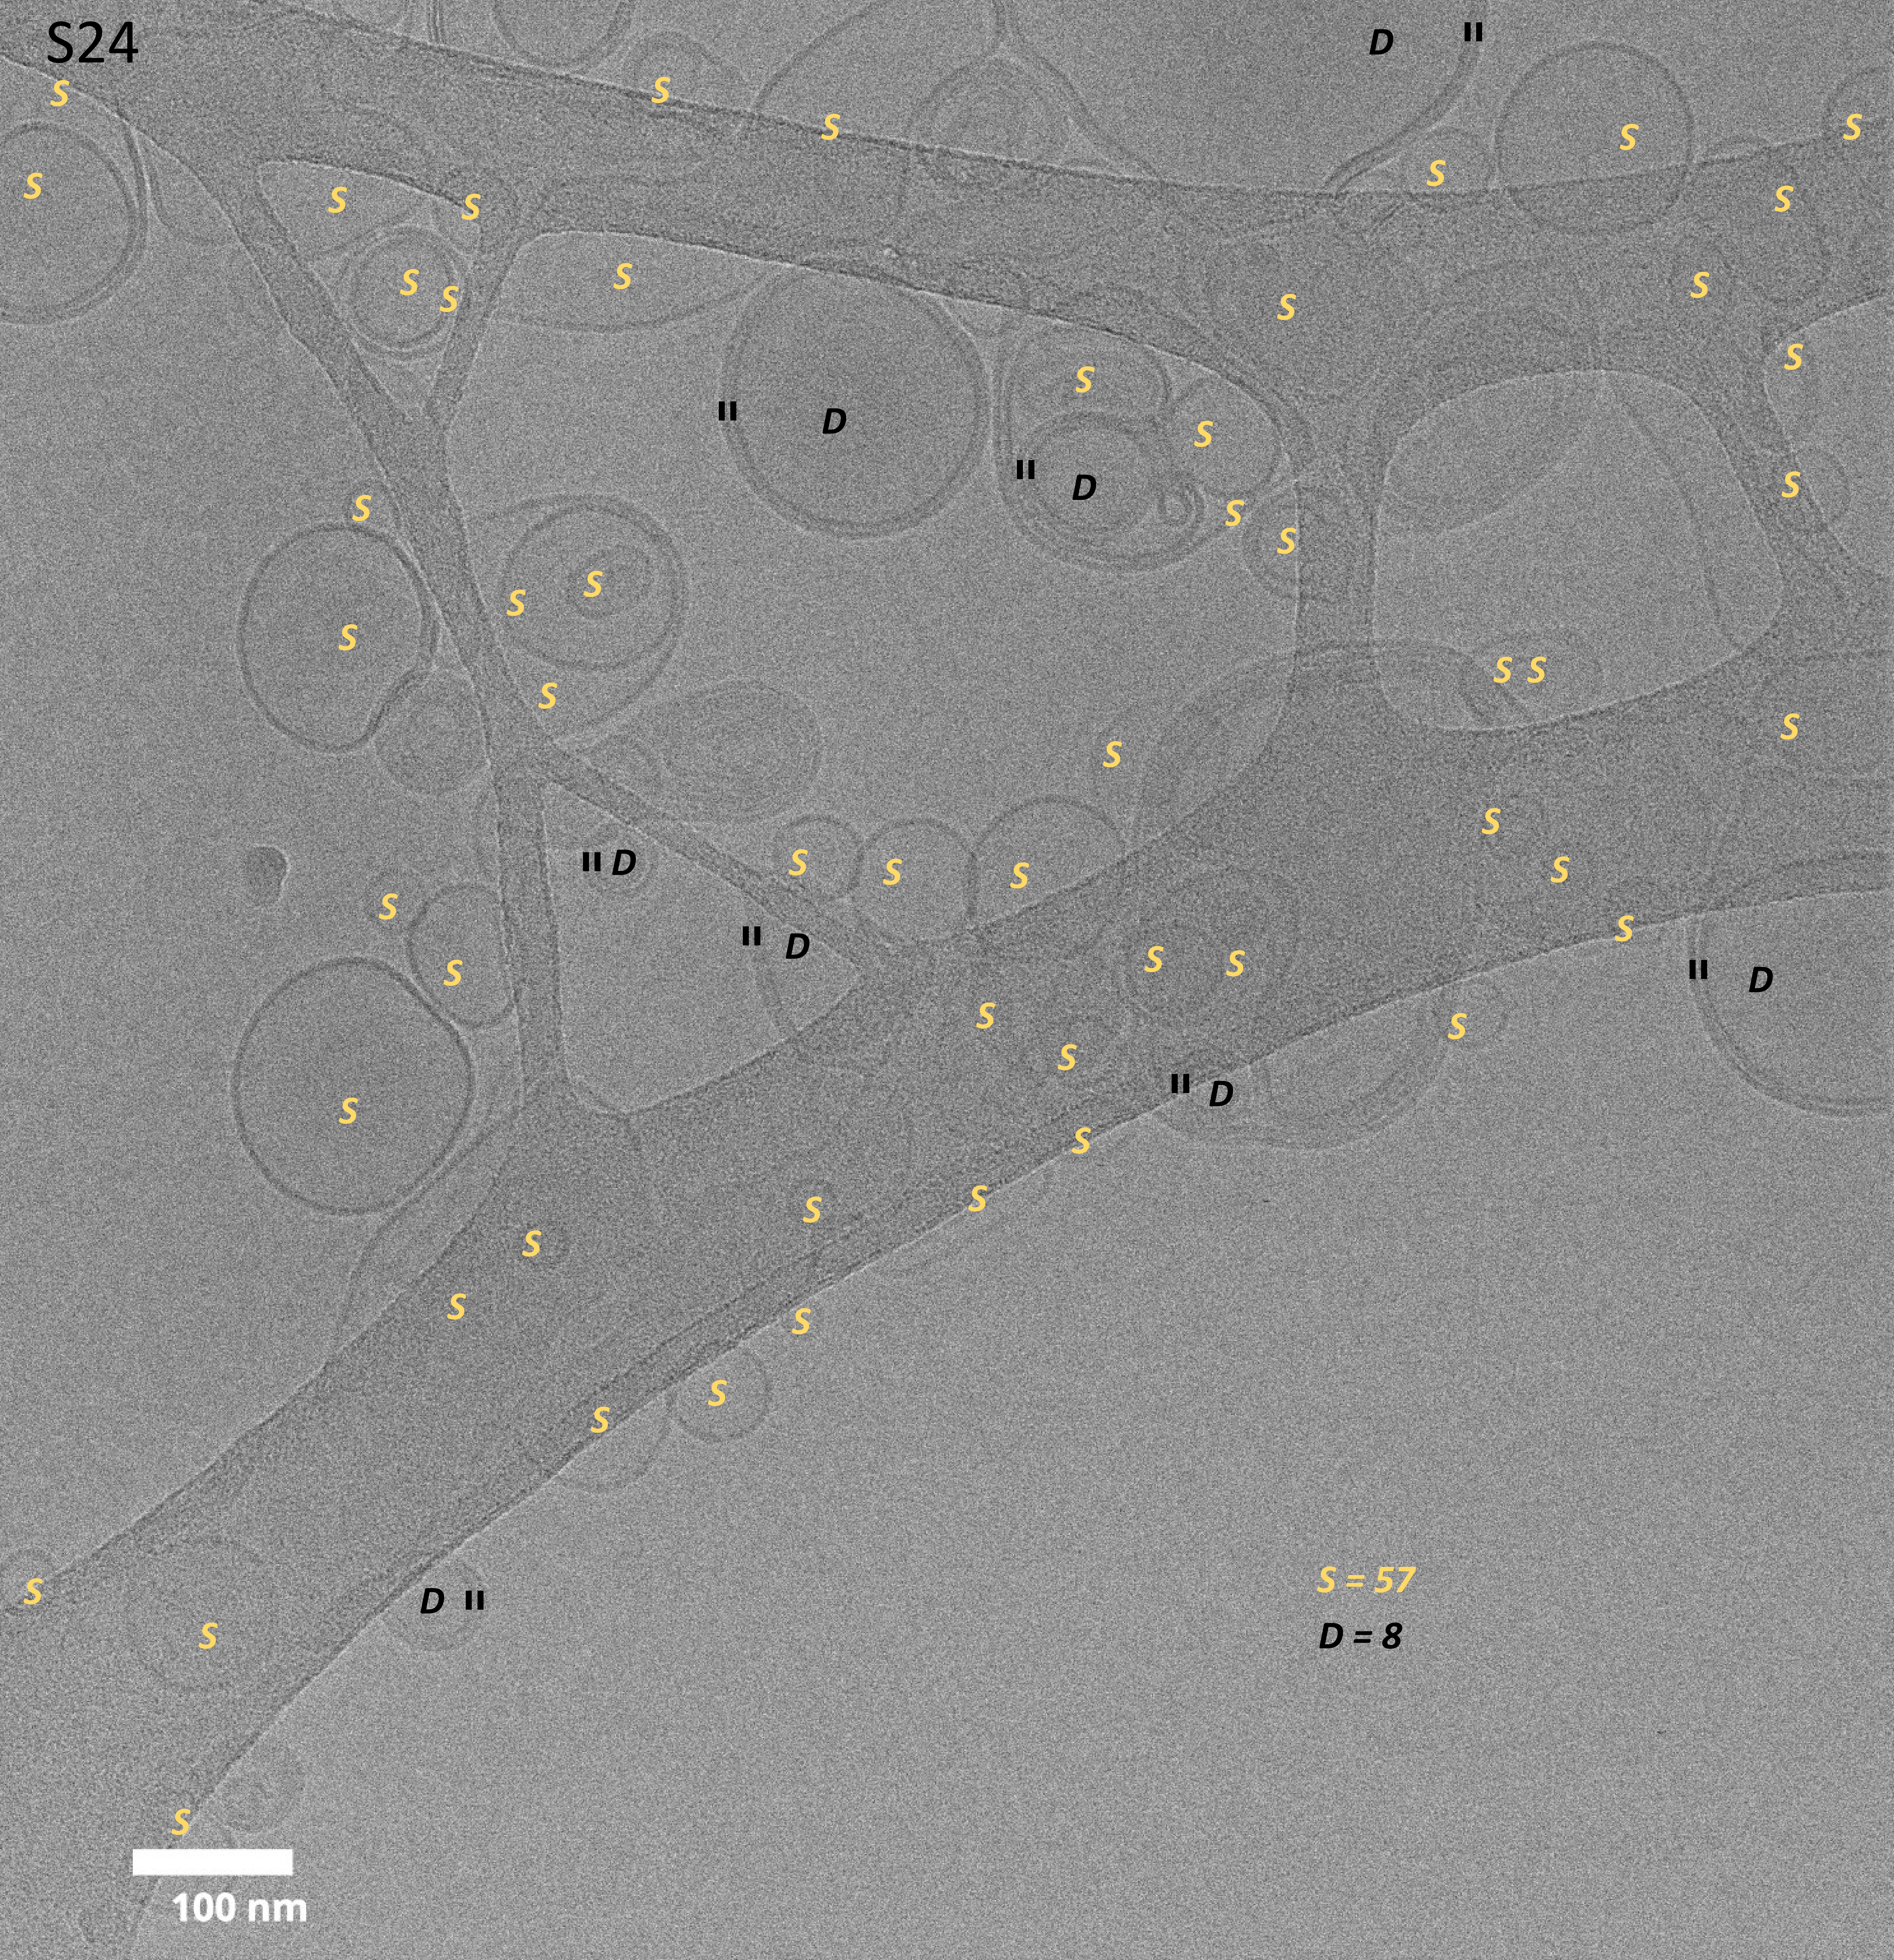

D ||

S = 57  
D = 8

100 nm



S25

$S = 43$

$D = 2$

100 nm

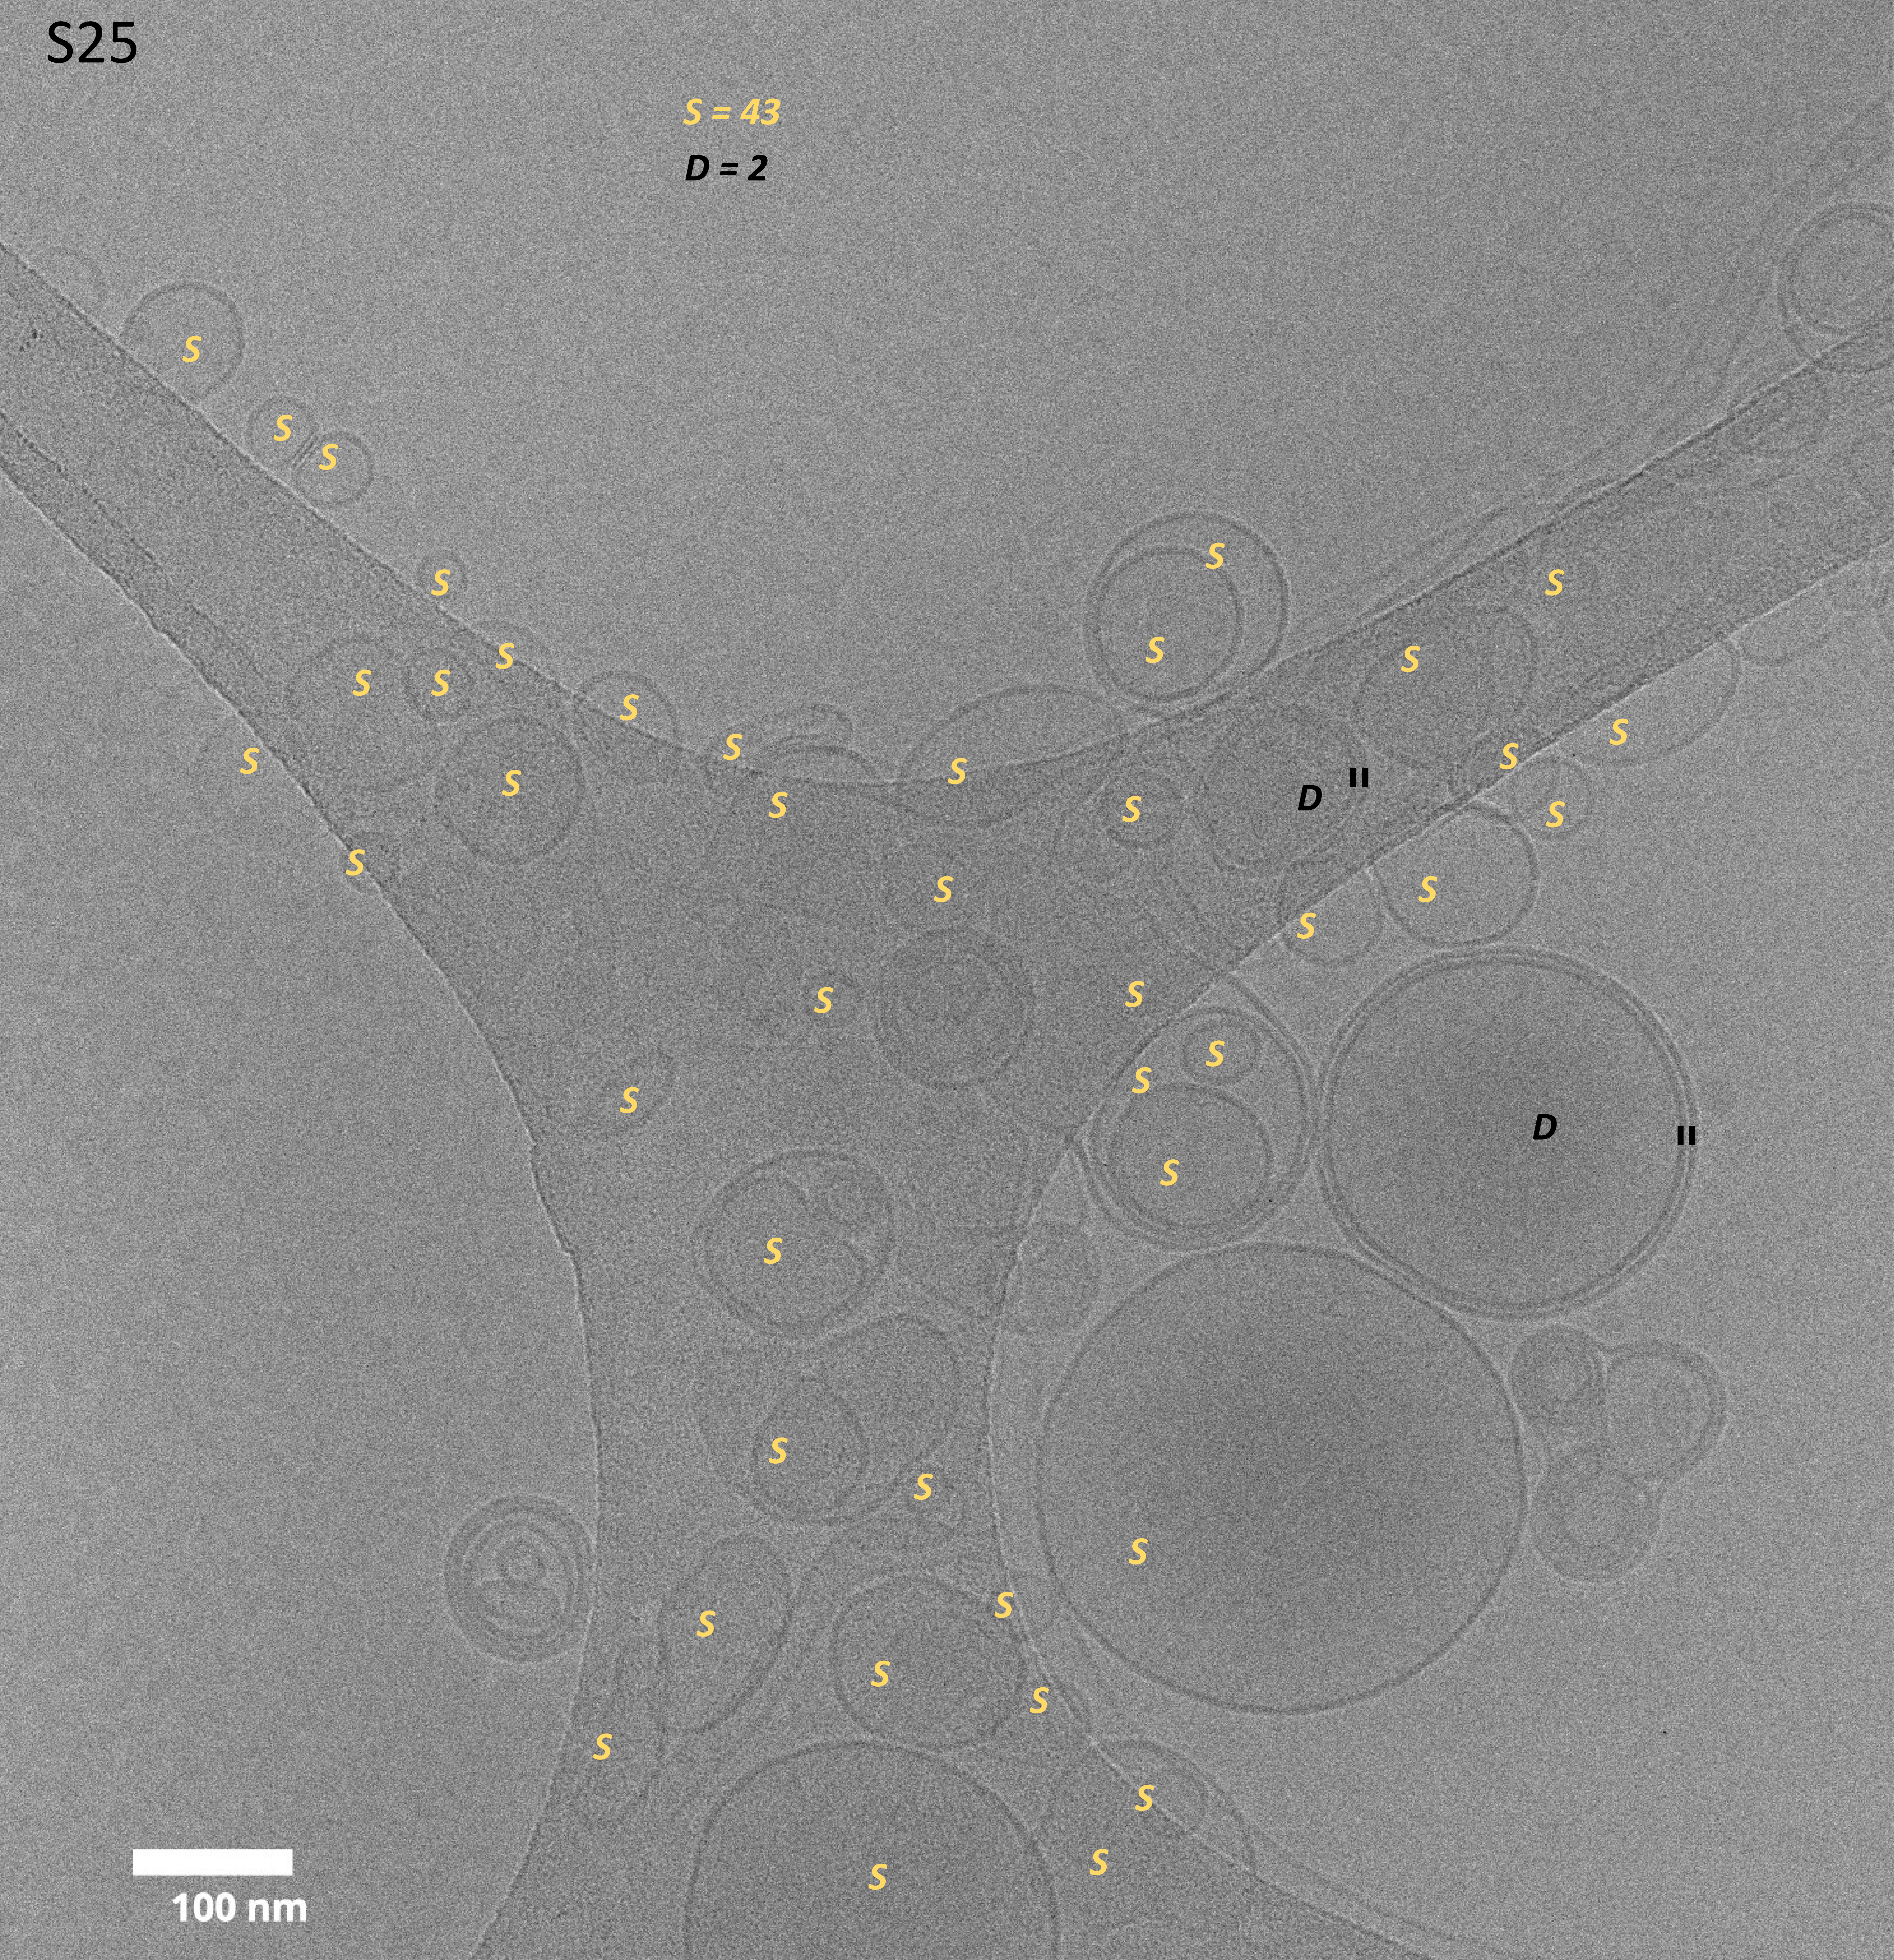



S26

*S* = 45

*D* = 12

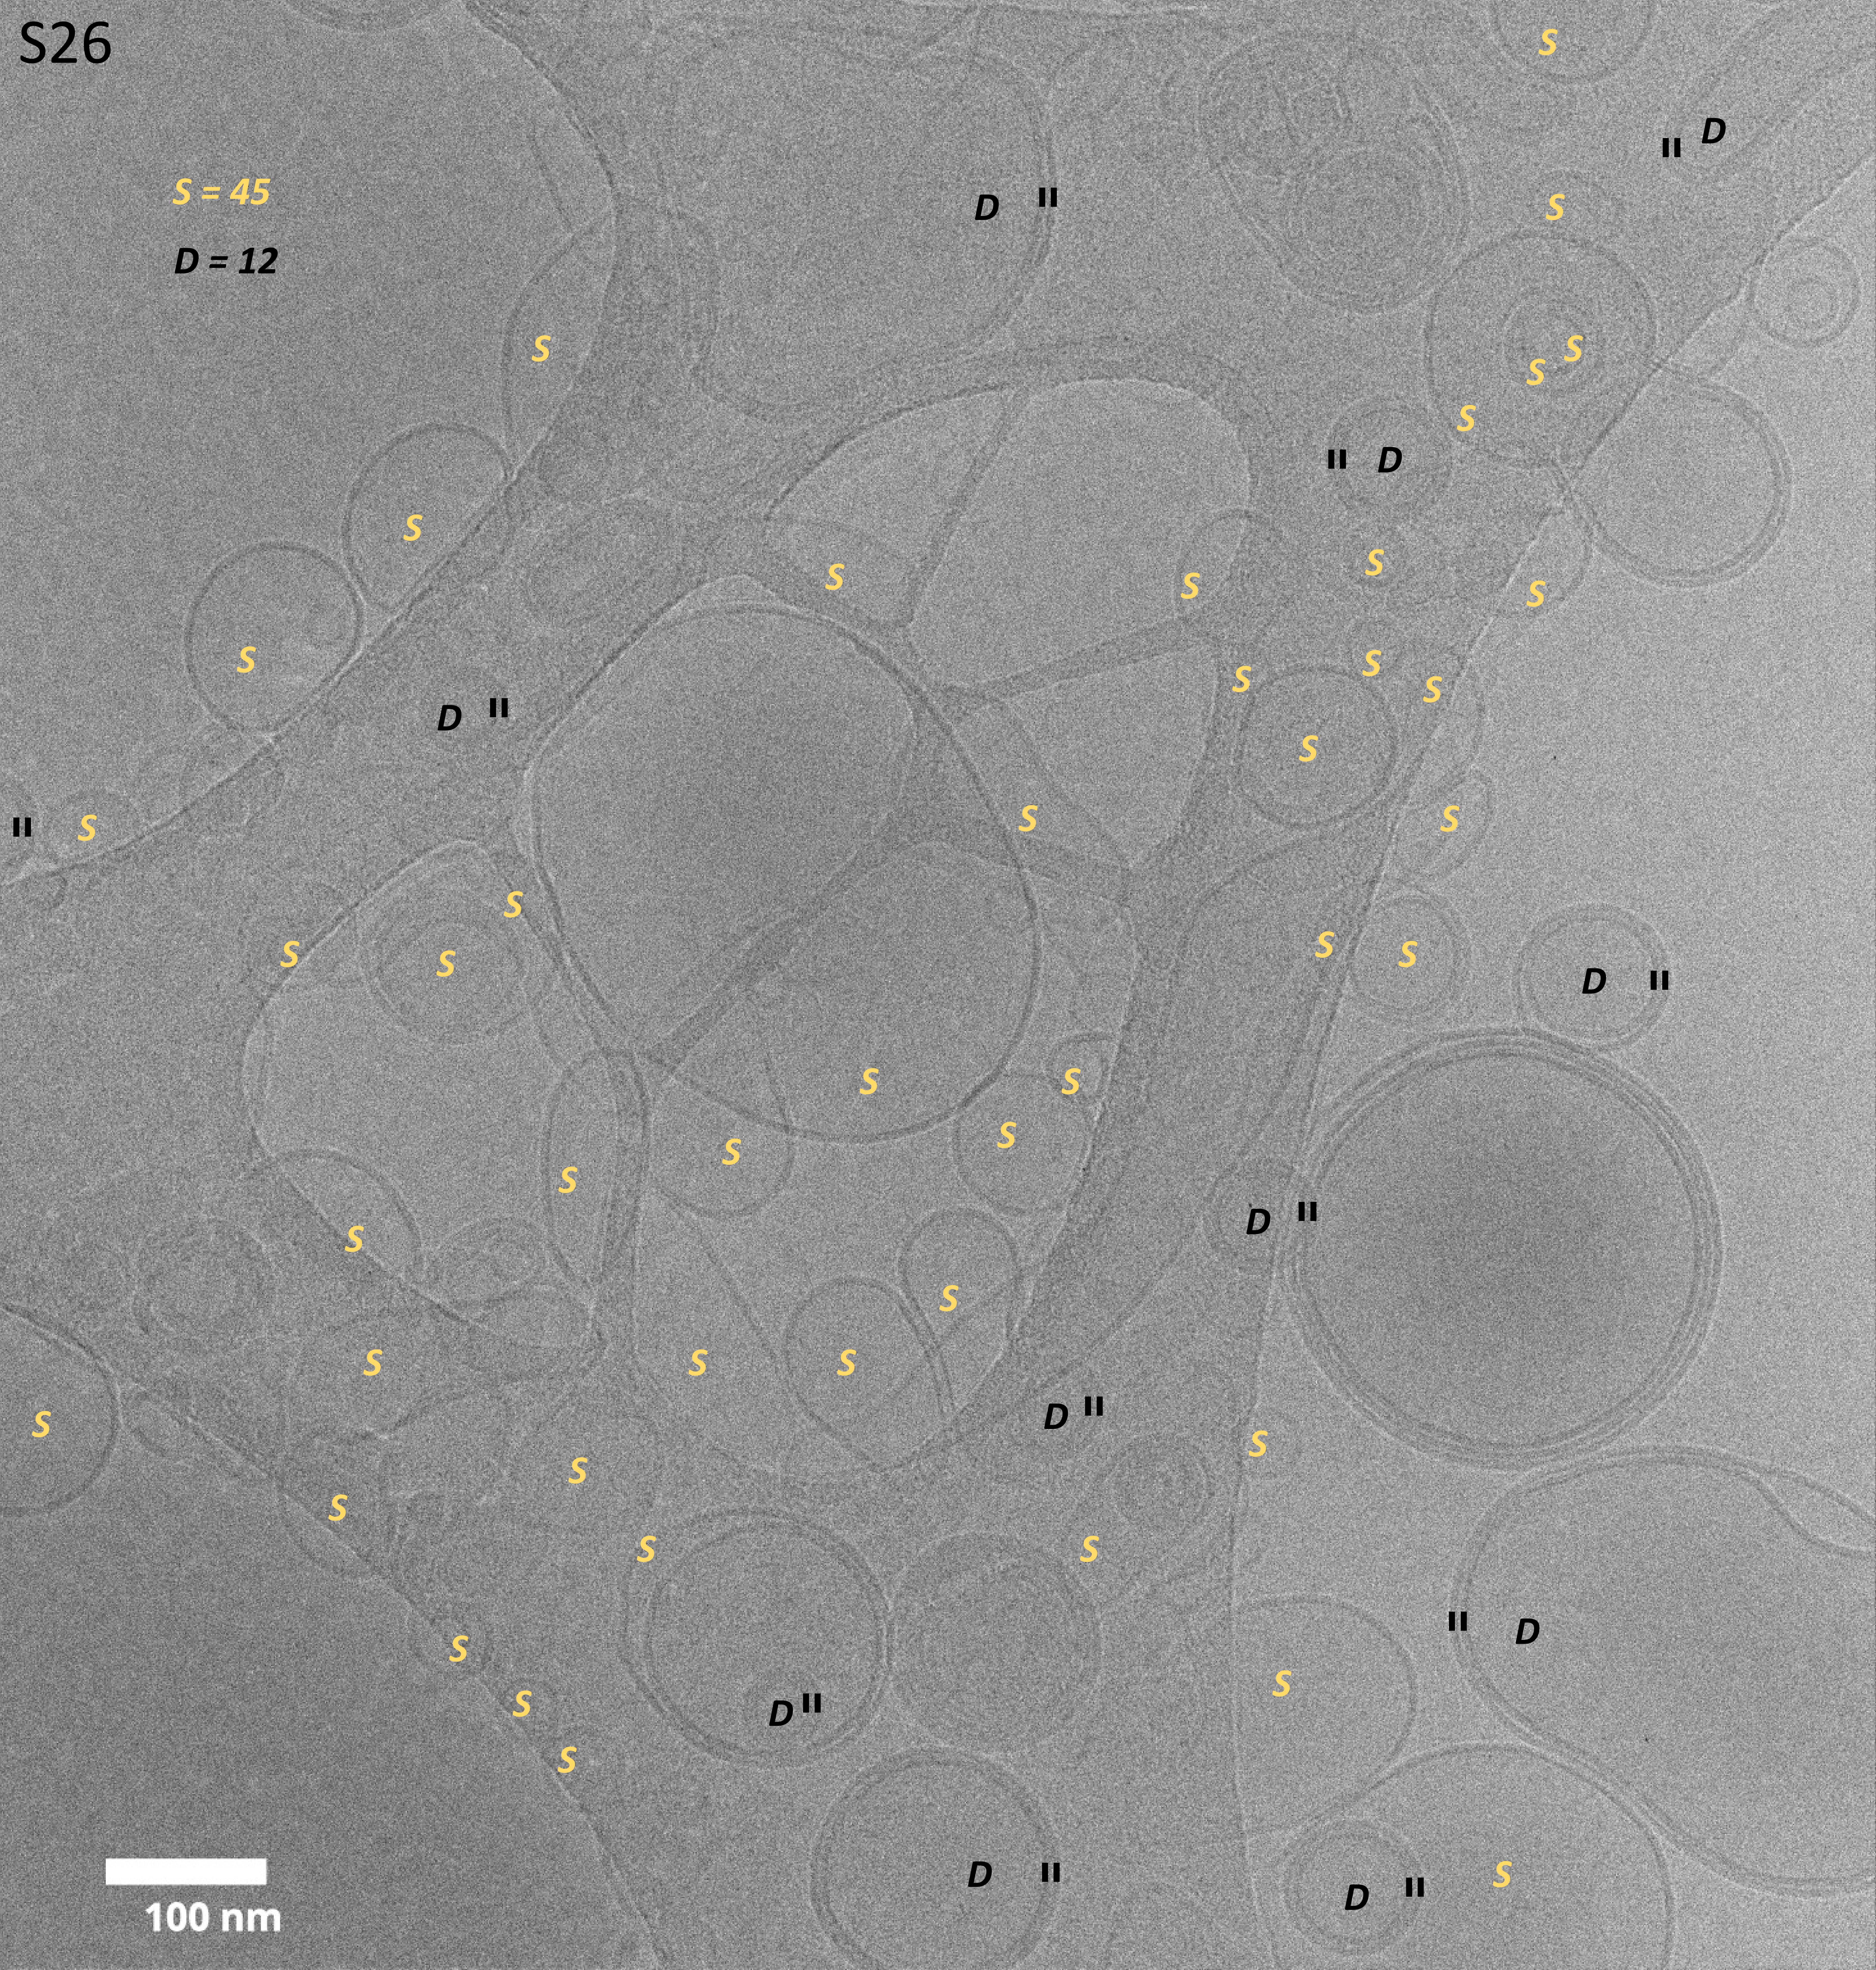

100 nm
